# Supplementary material for: Sulfonamides linked to sulfonate estersviahydrazone functionality: synthesis, human carbonic anhydrase inhibitory activities, and molecular modeling studies
Source: Royal Society of Chemistry journal article supplement (doi:10.1039/d2nj05703d), 2023-01-01
Supplement: d2nj05703d1.pdf [file d2nj05703d1.pdf]

**Sulfonamides linked to sulfonate esters via hydrazone functionality: Synthesis, human carbonic anhydrase inhibitory activities, and molecular modeling studies**

**M. İhsan Han<sup>a</sup>, Miyase Gözde Gündüz<sup>b</sup>, Gökçe Alçı<sup>c</sup>, Simone Giovannuzzi<sup>d</sup>, Dönay Yuvalı<sup>e</sup>, Claudiu T. Supuran<sup>d\*</sup>, Şengül Dilem Doğan<sup>f\*</sup>**

<sup>a</sup> Department of Pharmaceutical Chemistry, Faculty of Pharmacy, Erciyes University, 38039, Kayseri, Turkey

<sup>b</sup> Department of Pharmaceutical Chemistry, Faculty of Pharmacy, Hacettepe University, 06100, Ankara, Turkey

<sup>c</sup> Drug Application and Research Center, Erciyes University, 38039 Kayseri, Turkey

<sup>d</sup> Neurofarba Department, Università degli Studi di Firenze, Sezione di Scienze Farmaceutiche, Via Ugo Schiff 6, 50019 Sesto Fiorentino, Florence, Italy

<sup>e</sup> Faculty of Pharmacy, Department of Analytical Chemistry, Erciyes University, Kayseri, 38039, Turkey

<sup>f</sup> Department of Basic Sciences, Faculty of Pharmacy, Erciyes University, 38039, Kayseri, Turkey

\* Corresponding authors:

Prof. Dr. Claudiu T. Supuran, Università degli Studi di Firenze, Sezione di Scienze Farmaceutiche, e-mail: [claudiu.supuran@unifi.it](mailto:claudiu.supuran@unifi.it)

Dr. Şengül Dilem Doğan, Department of Basic Sciences, Faculty of Pharmacy, Erciyes University, 38039, Kayseri, Turkey, e-mail: [dogandilem@gmail.com](mailto:dogandilem@gmail.com)

**Content**

**Page**

<sup>1</sup>H NMR, <sup>13</sup>C NMR, HRMS, and FT-IR spectra of **SH1-SH14**

2-29

Binding mode of **SH3** in the active site of hCA I and II

30

<sup>1</sup>H NMR, <sup>13</sup>C NMR, HRMS, and FT-IR spectra of **SH1**

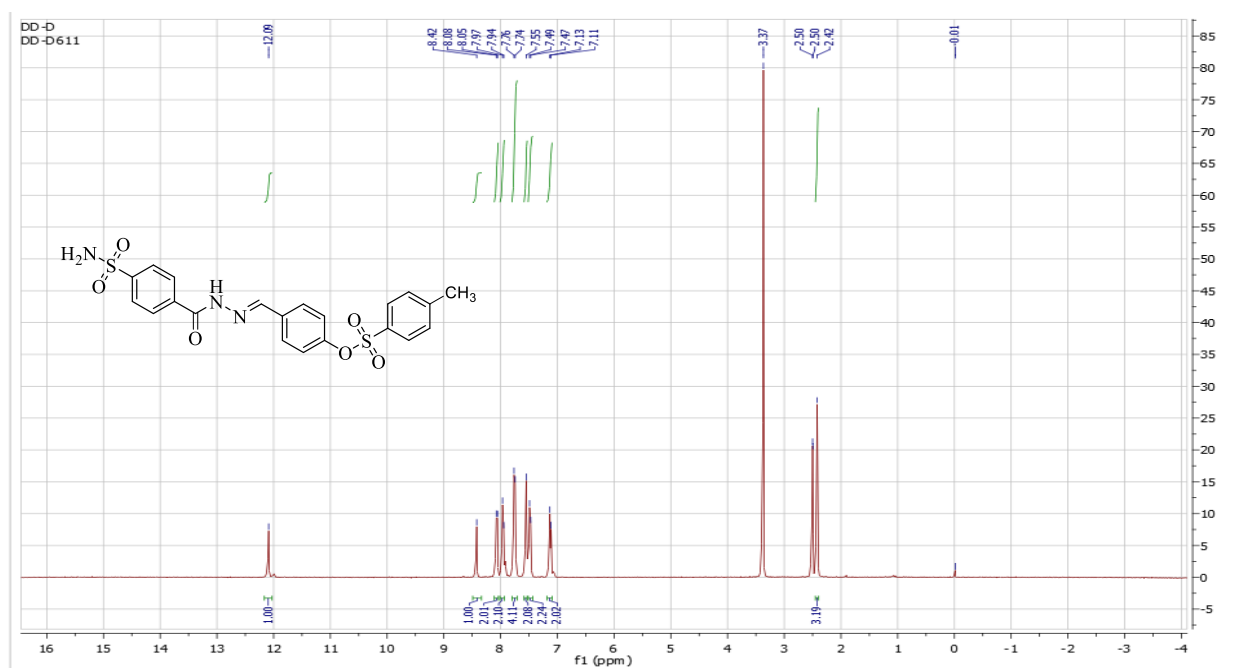

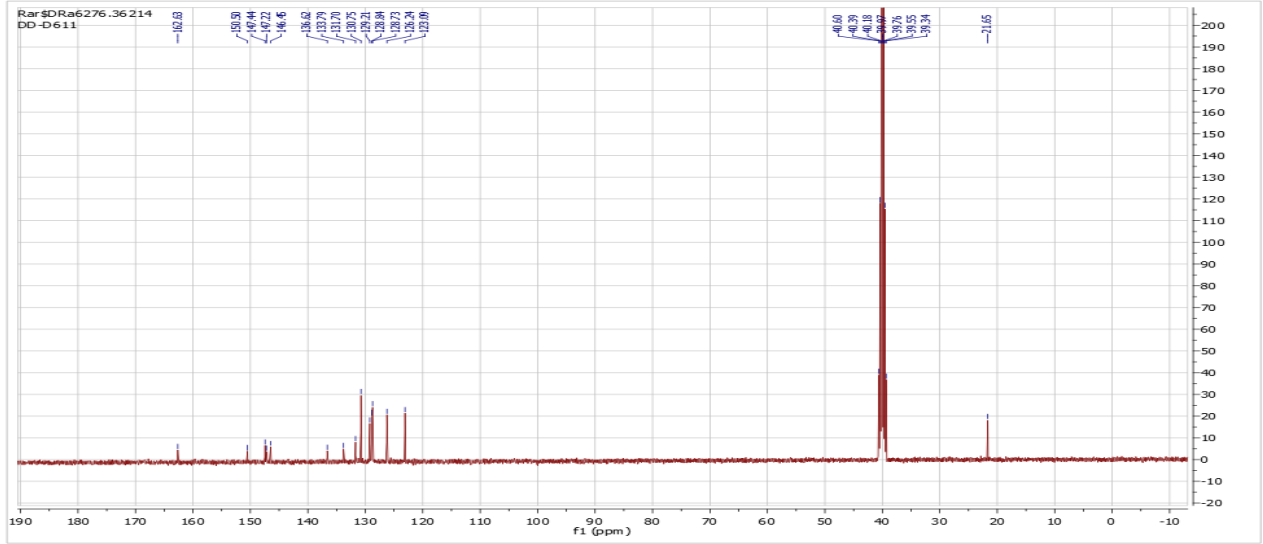

### User Spectra

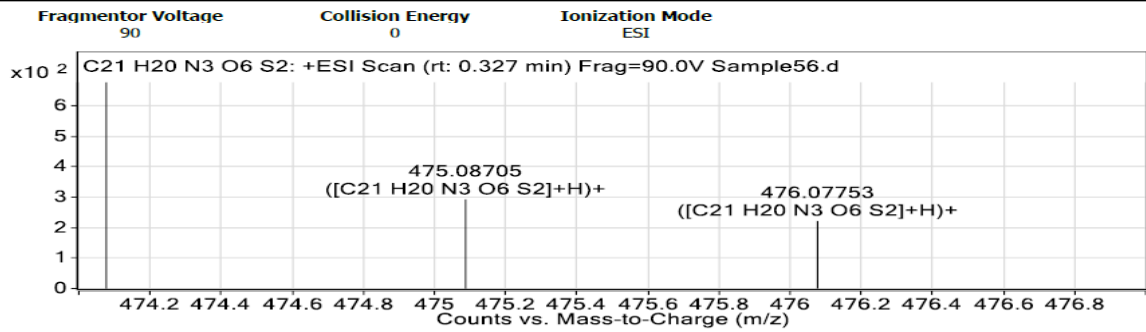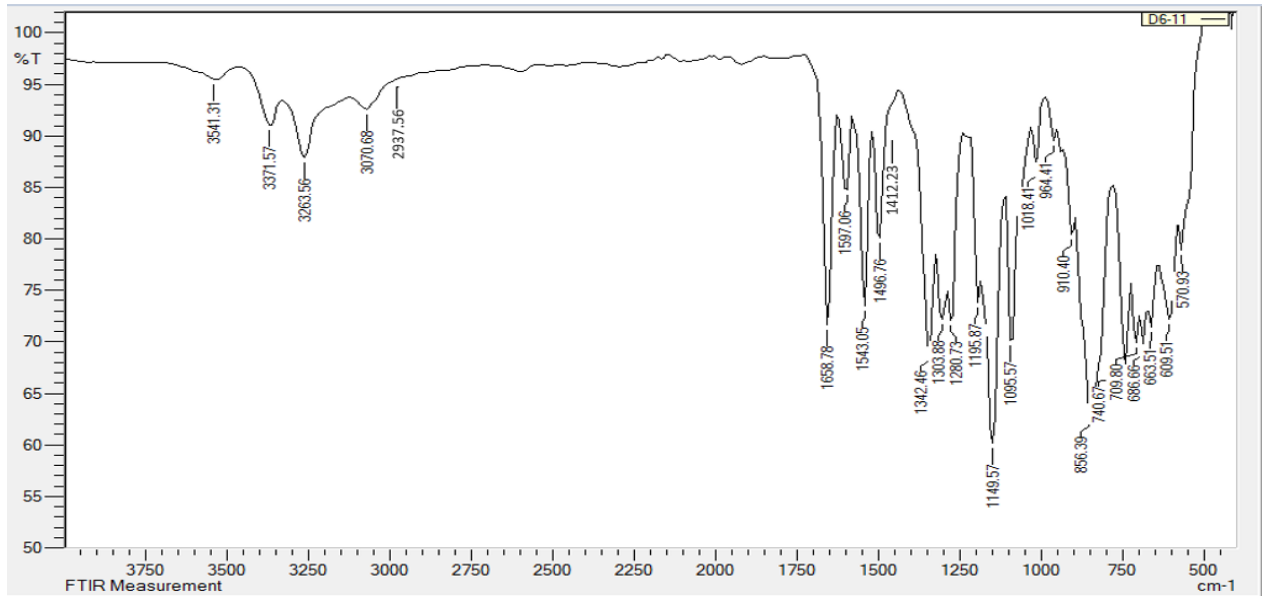

$^1\text{H}$  NMR,  $^{13}\text{C}$  NMR, HRMS, and FT-IR spectra of **SH2**

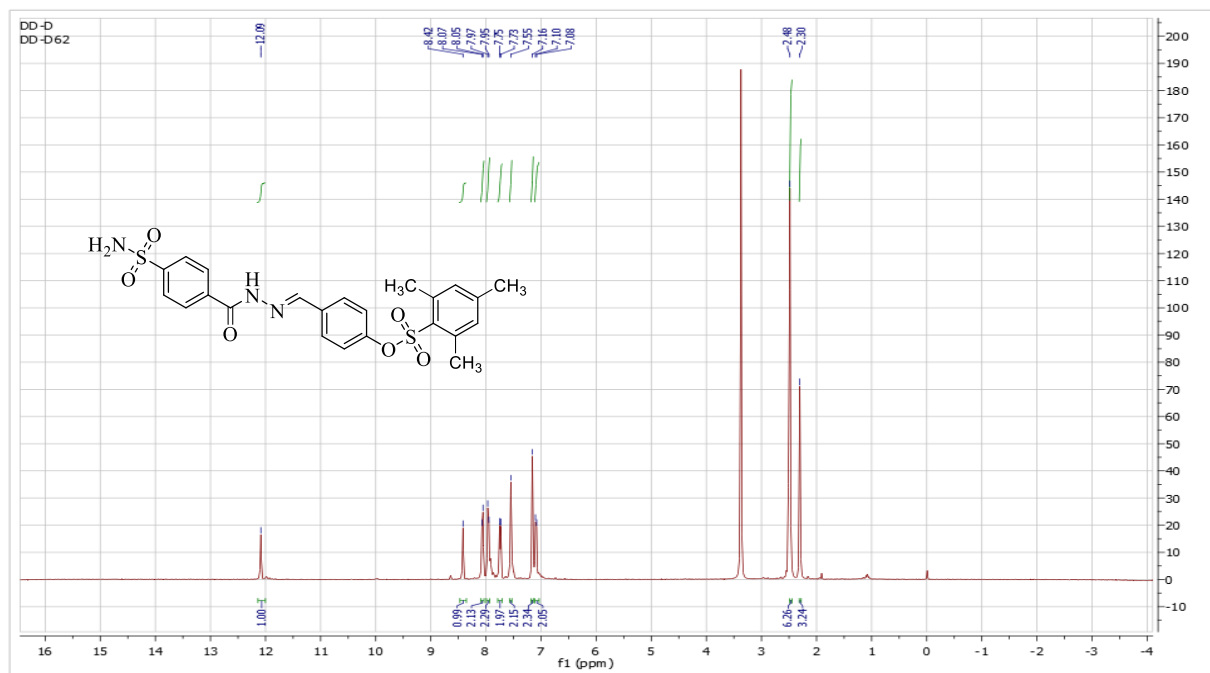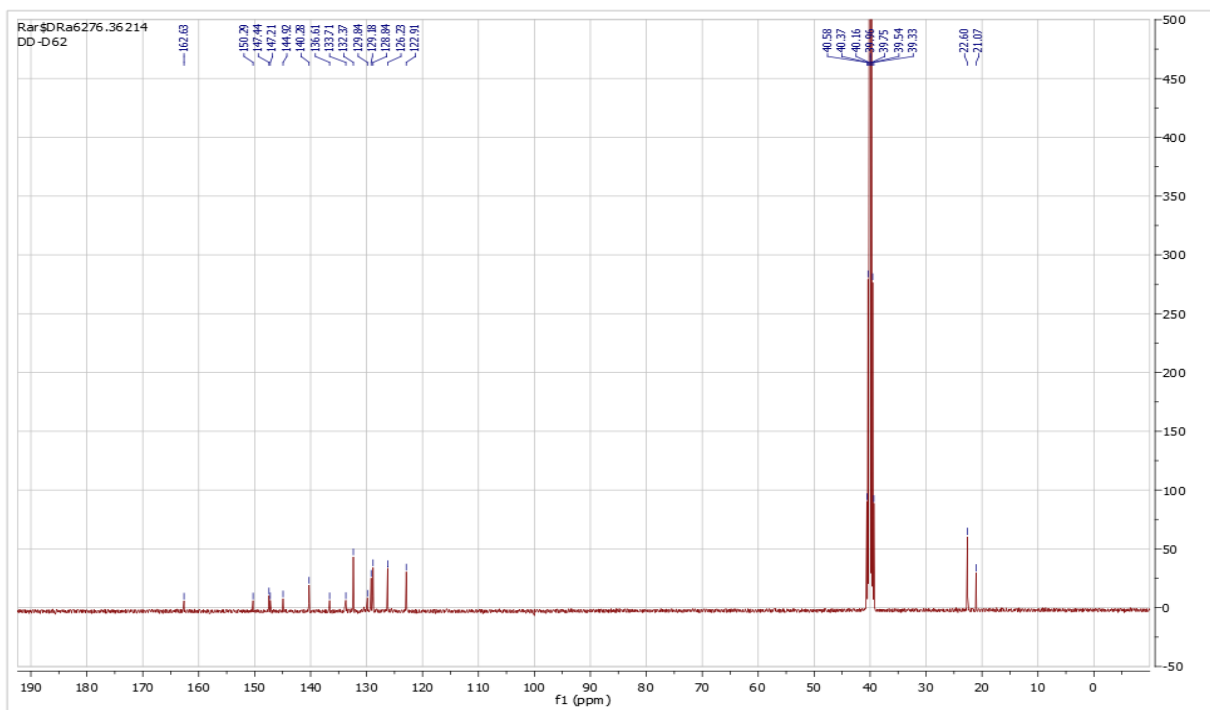

# User Spectra

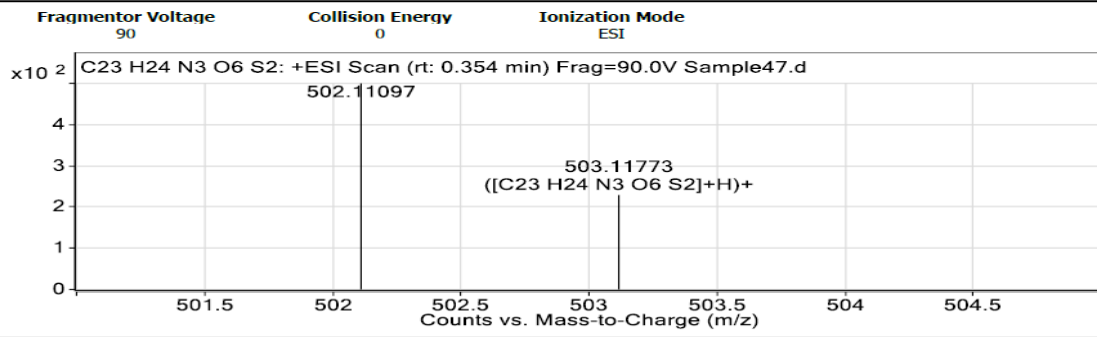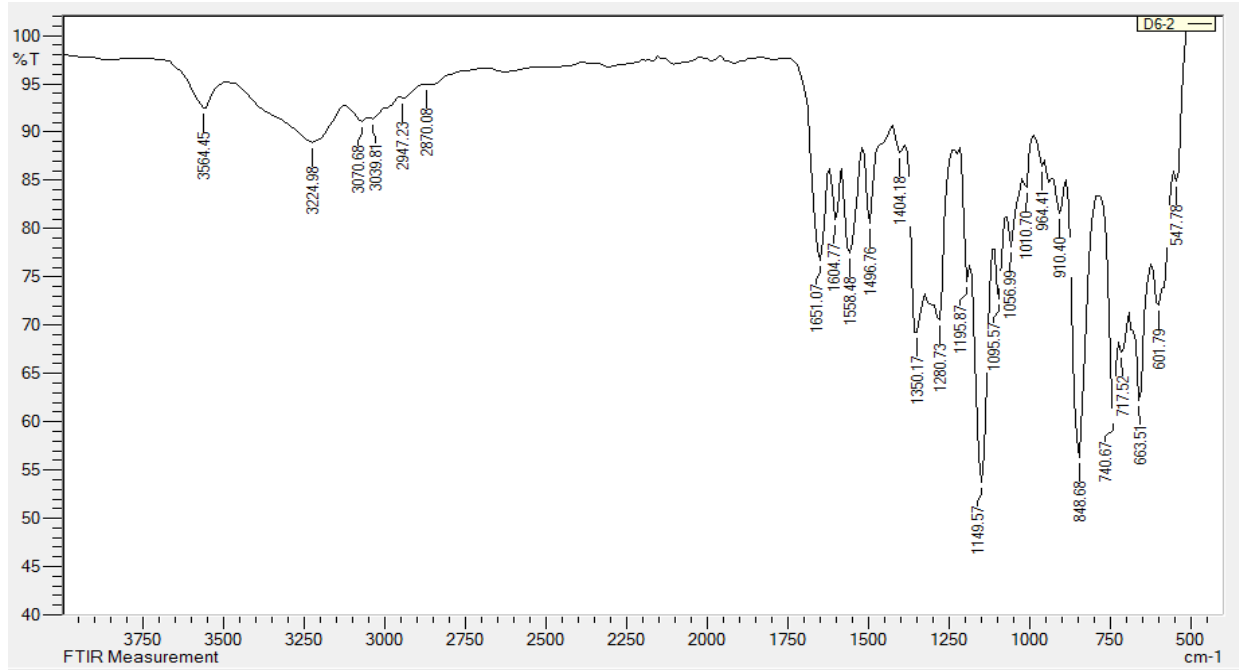

$^1\text{H}$  NMR,  $^{13}\text{C}$  NMR, HRMS, and FT-IR spectra of **SH3**

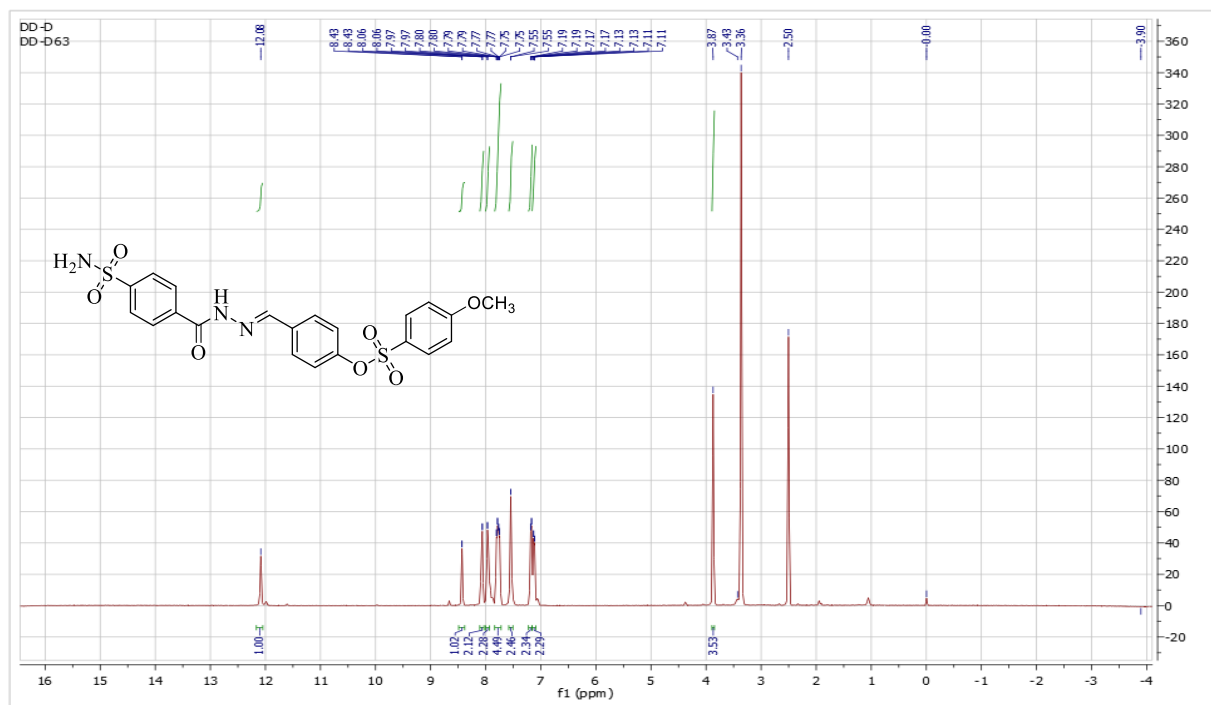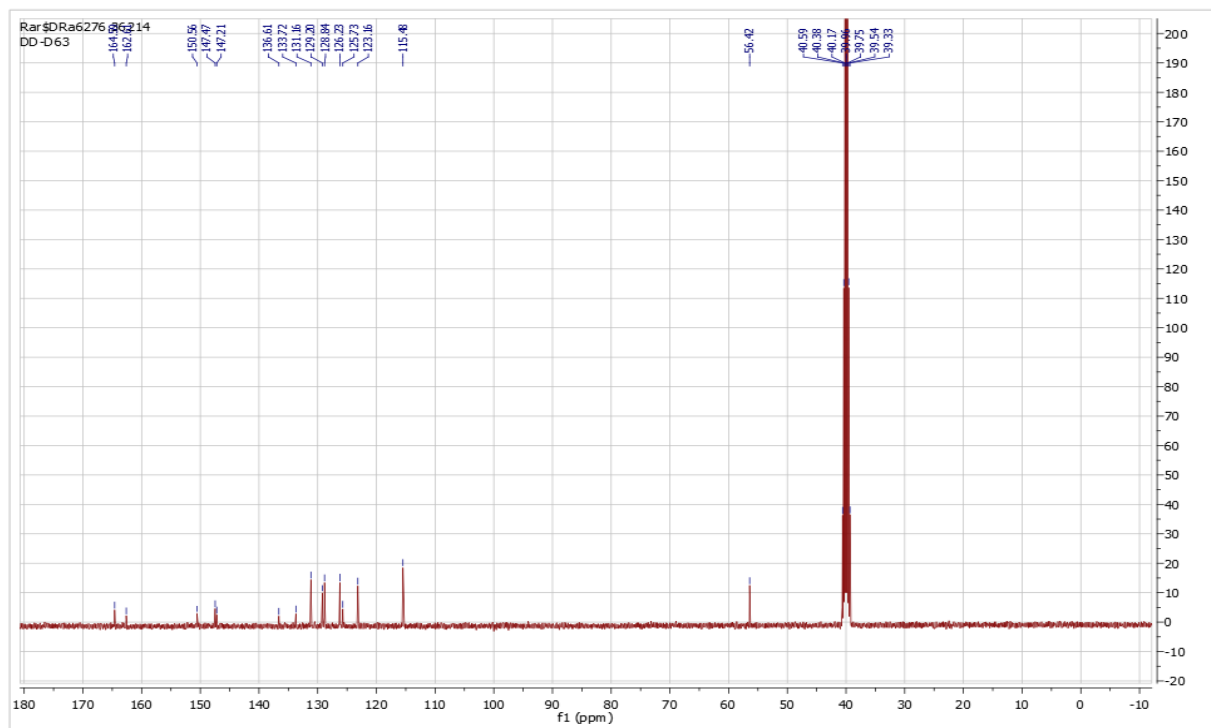

# User Spectra

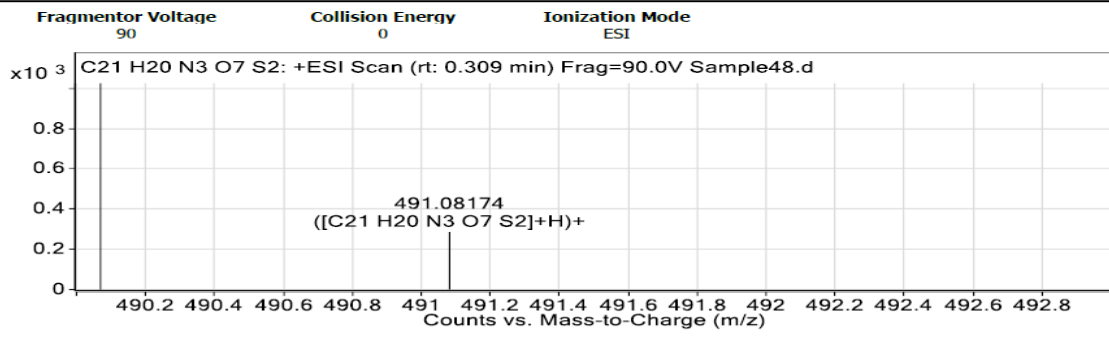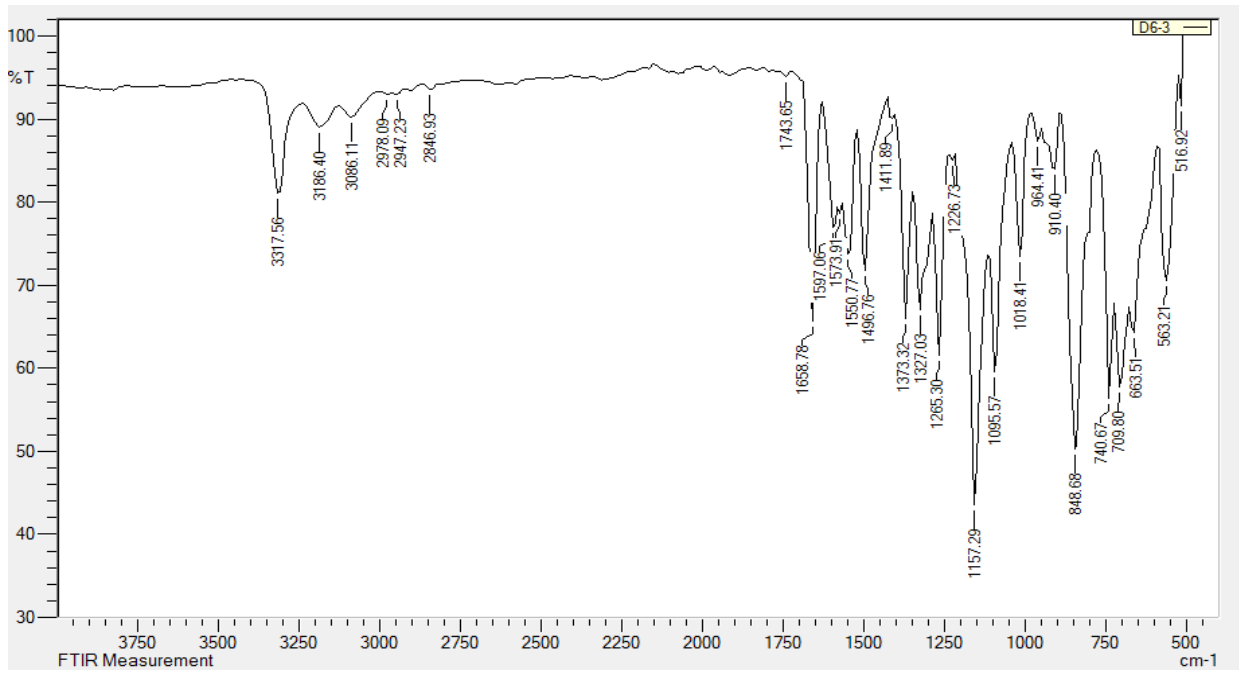

$^1\text{H}$  NMR,  $^{13}\text{C}$  NMR, HRMS, and FT-IR spectra of **SH4**

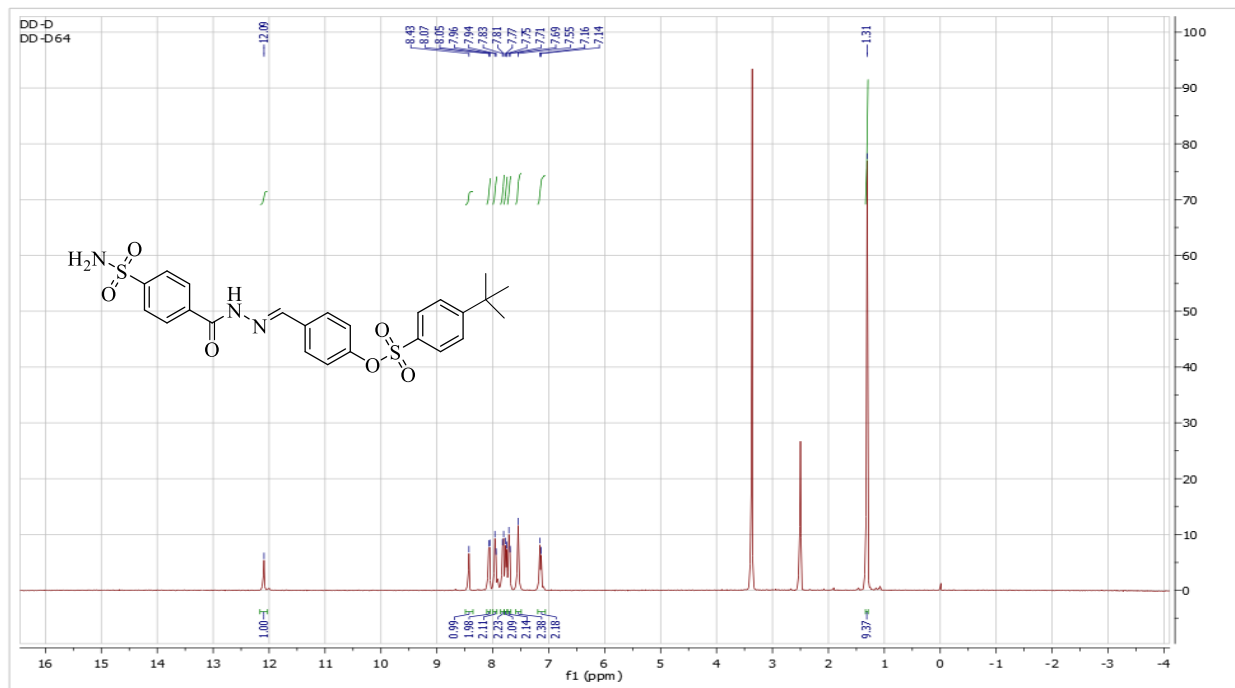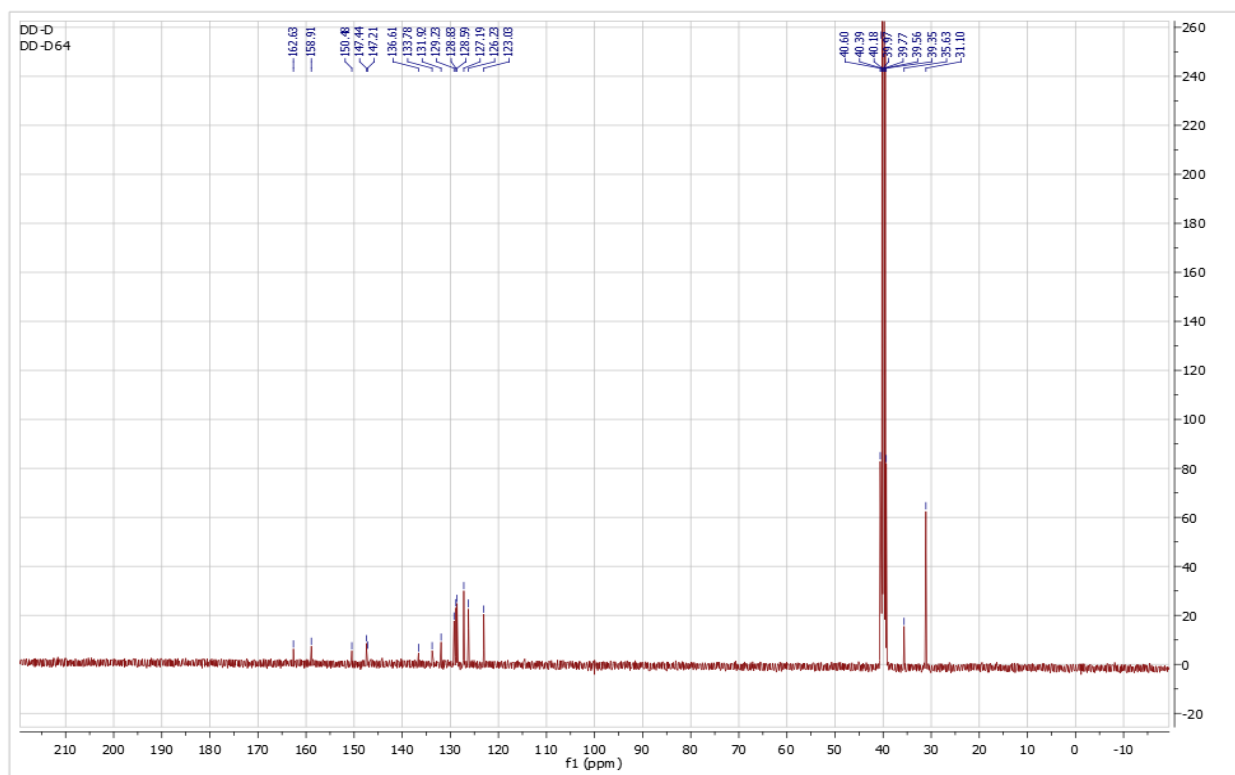



### User Spectra

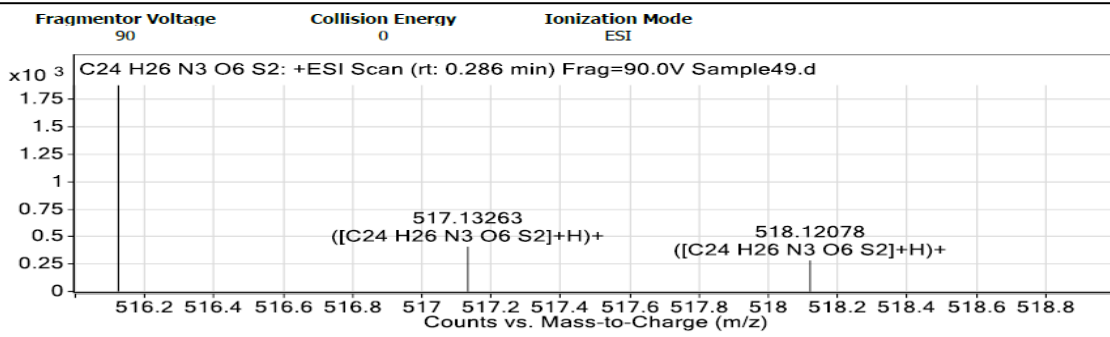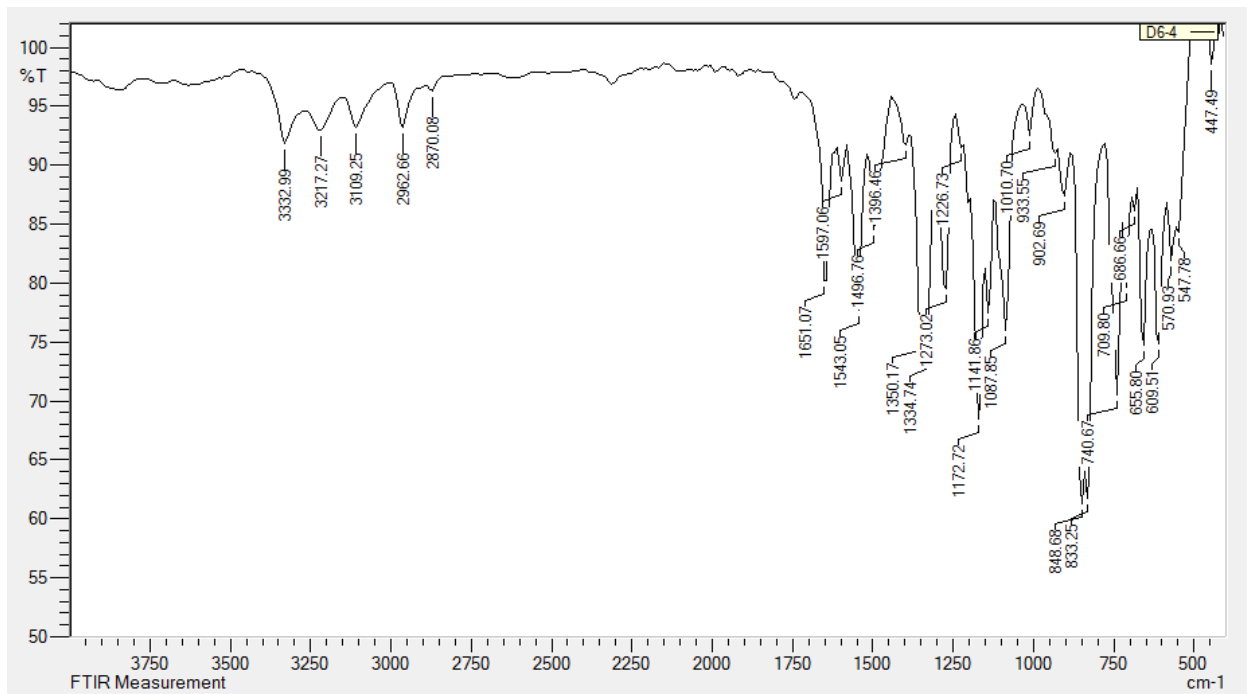

# $^1\text{H}$ NMR, $^{13}\text{C}$ NMR, HRMS, and FT-IR spectra of SH5

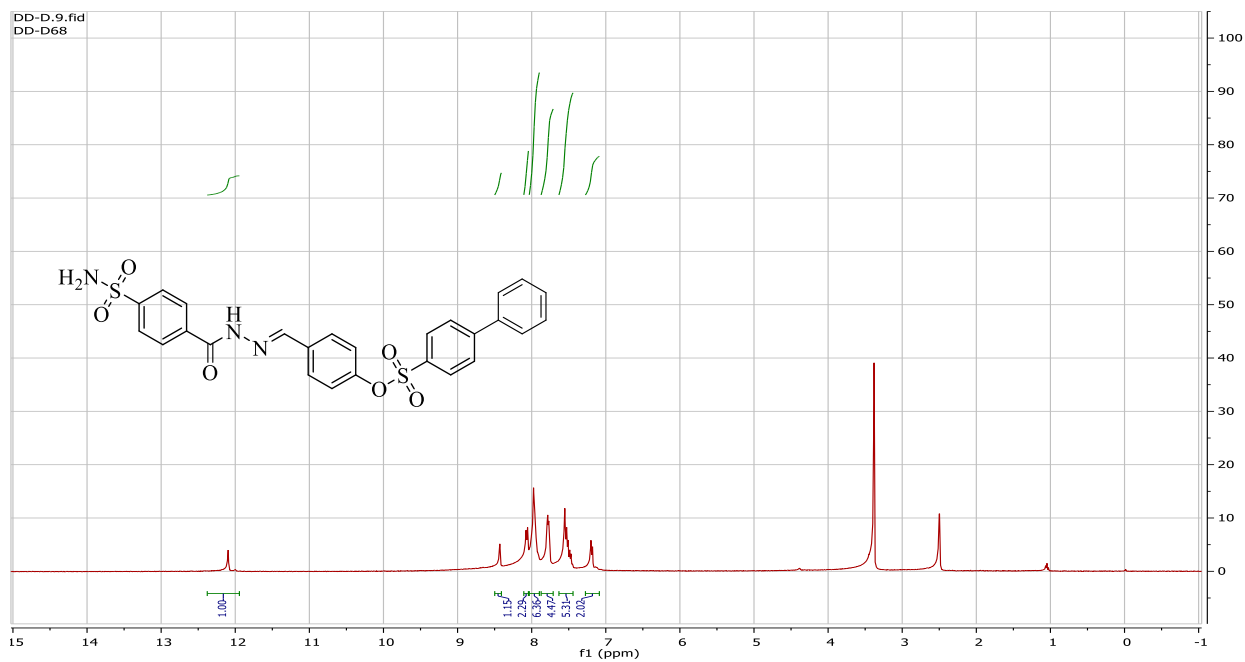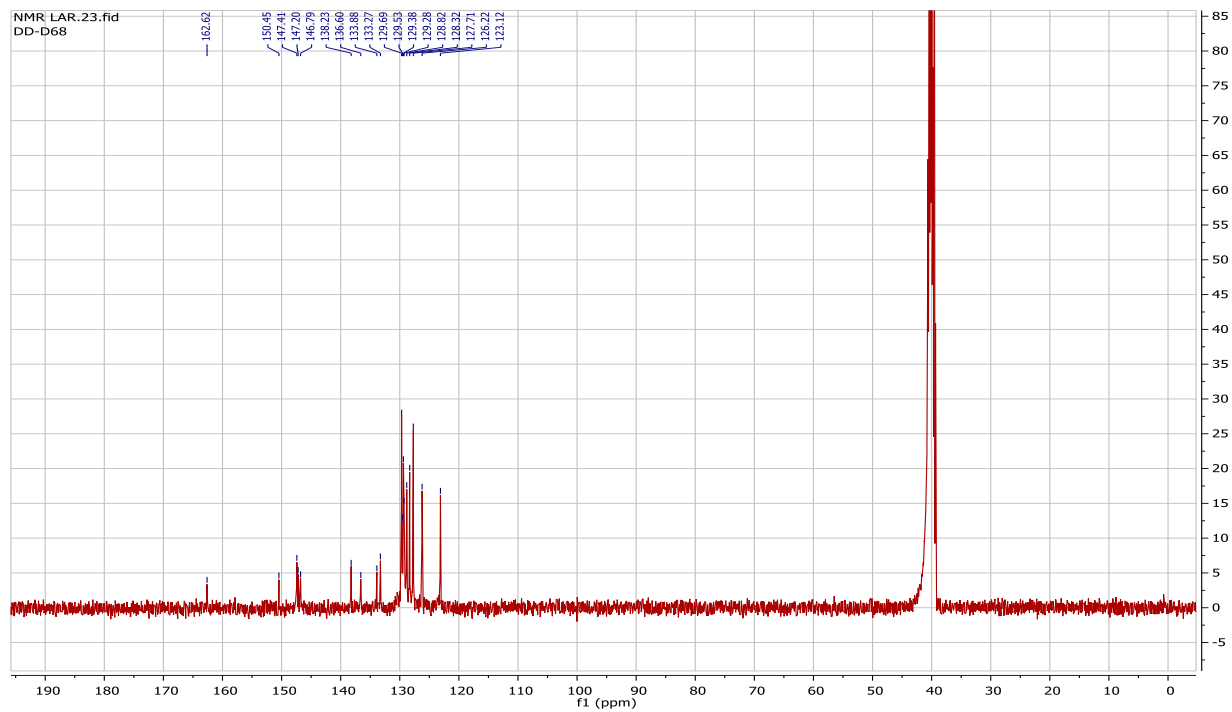

# User Spectra

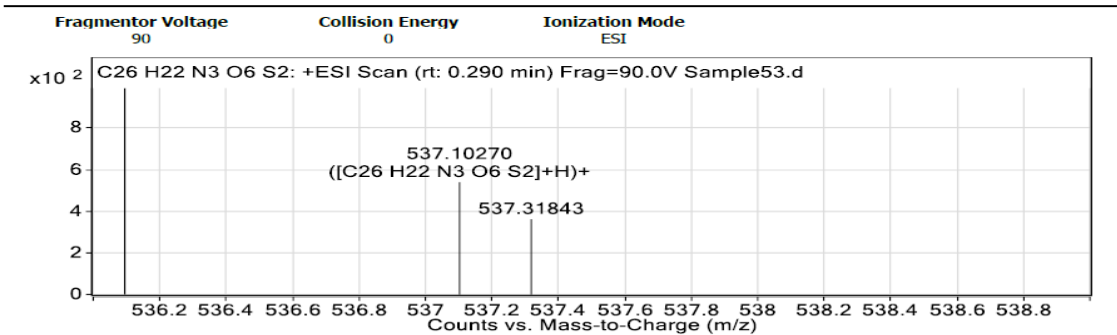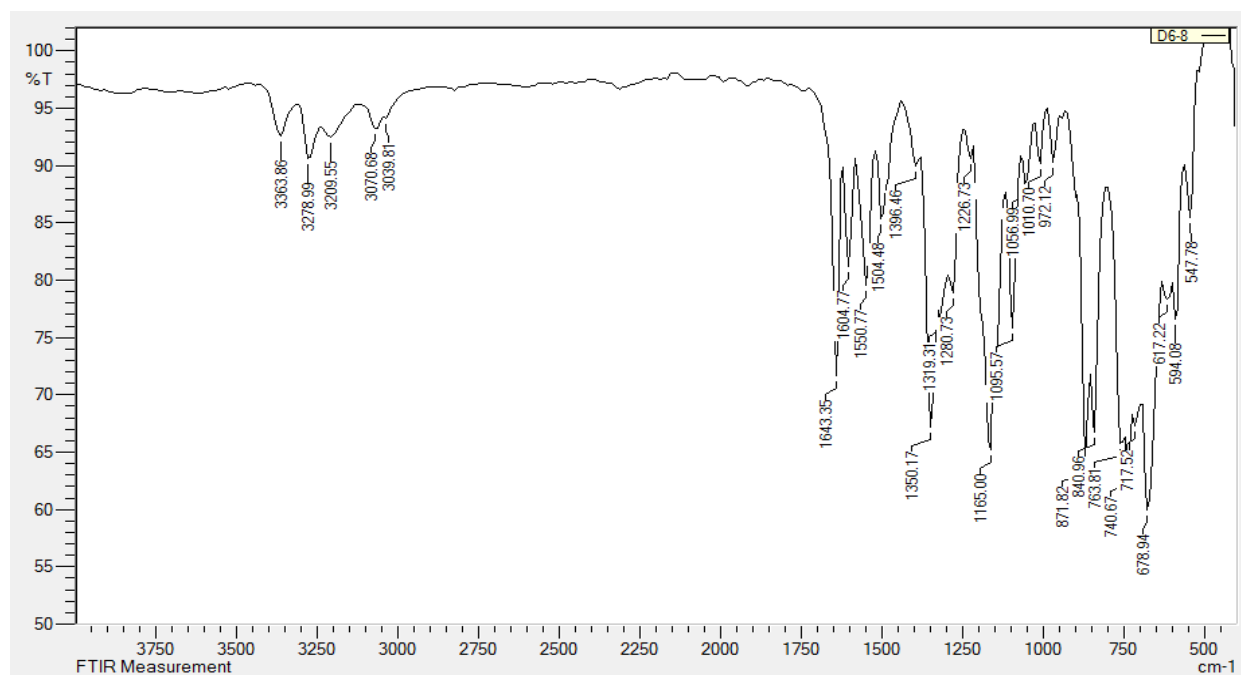

# <sup>1</sup>H NMR, <sup>13</sup>C NMR, HRMS, and FT-IR spectra of SH6

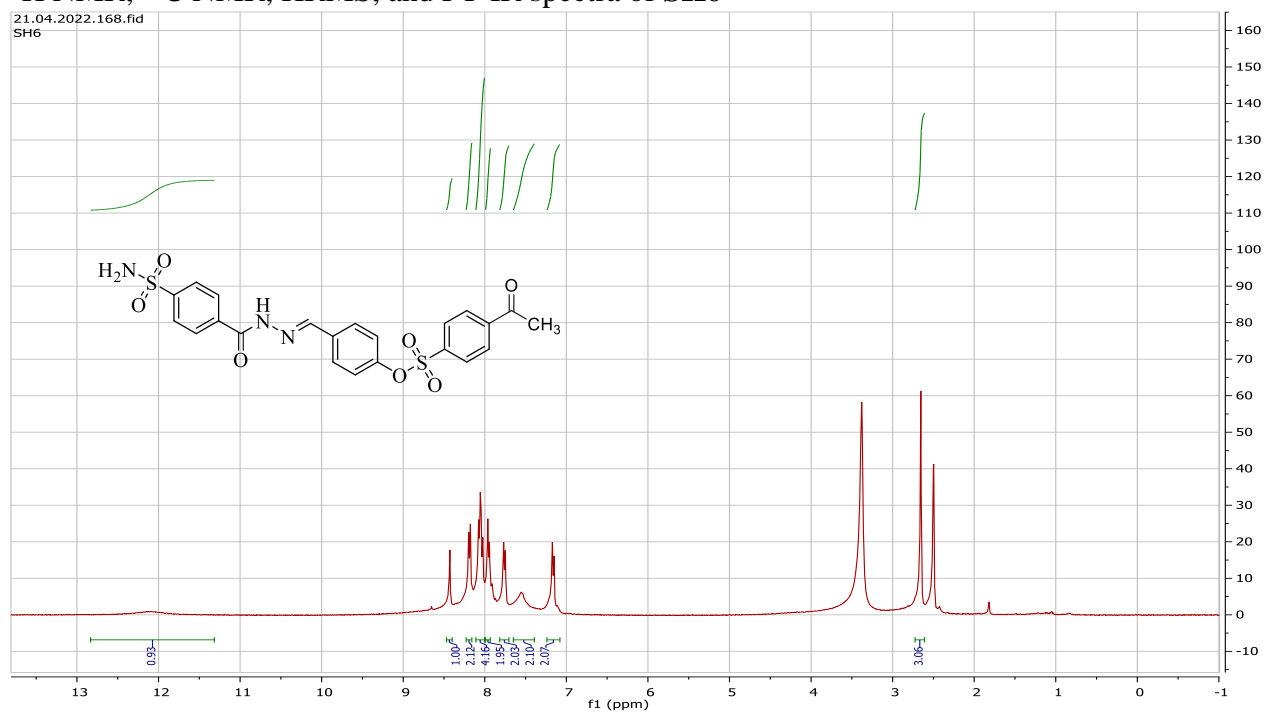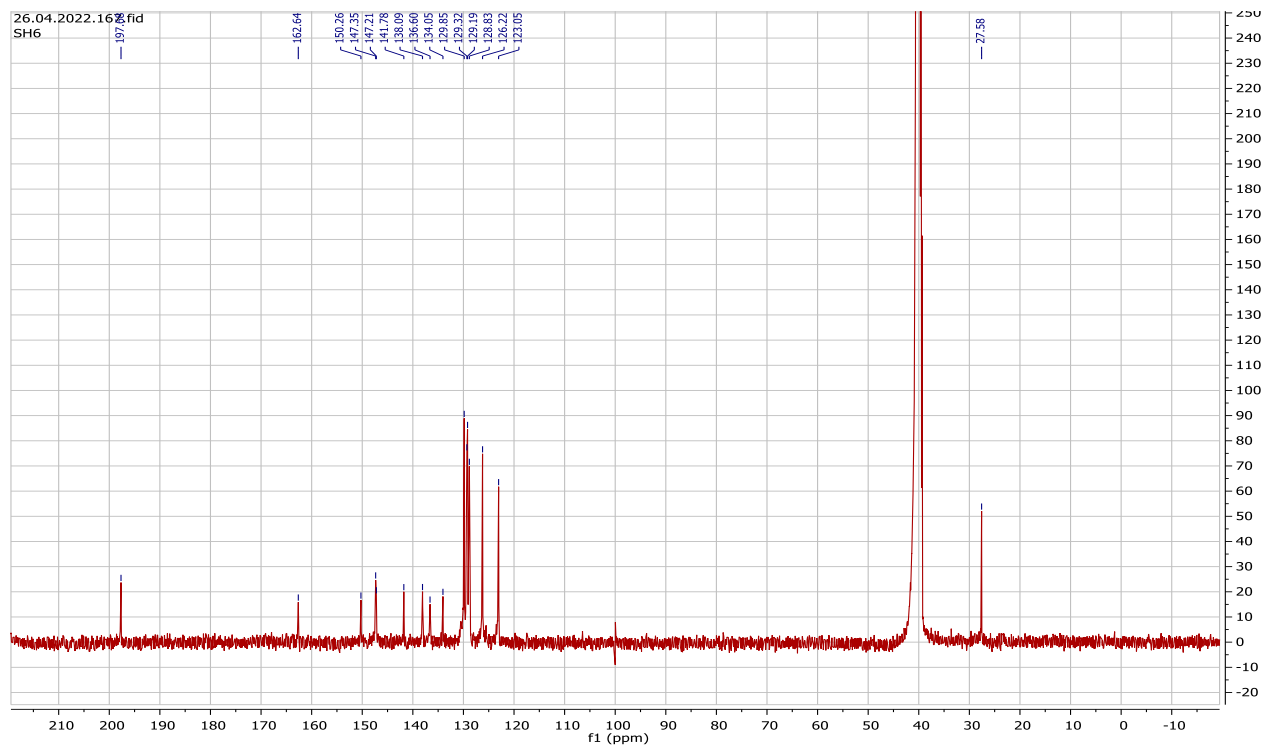

### User Spectra

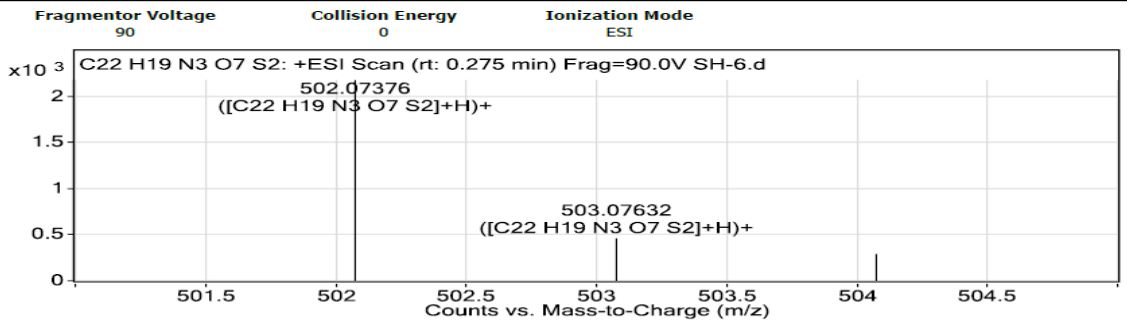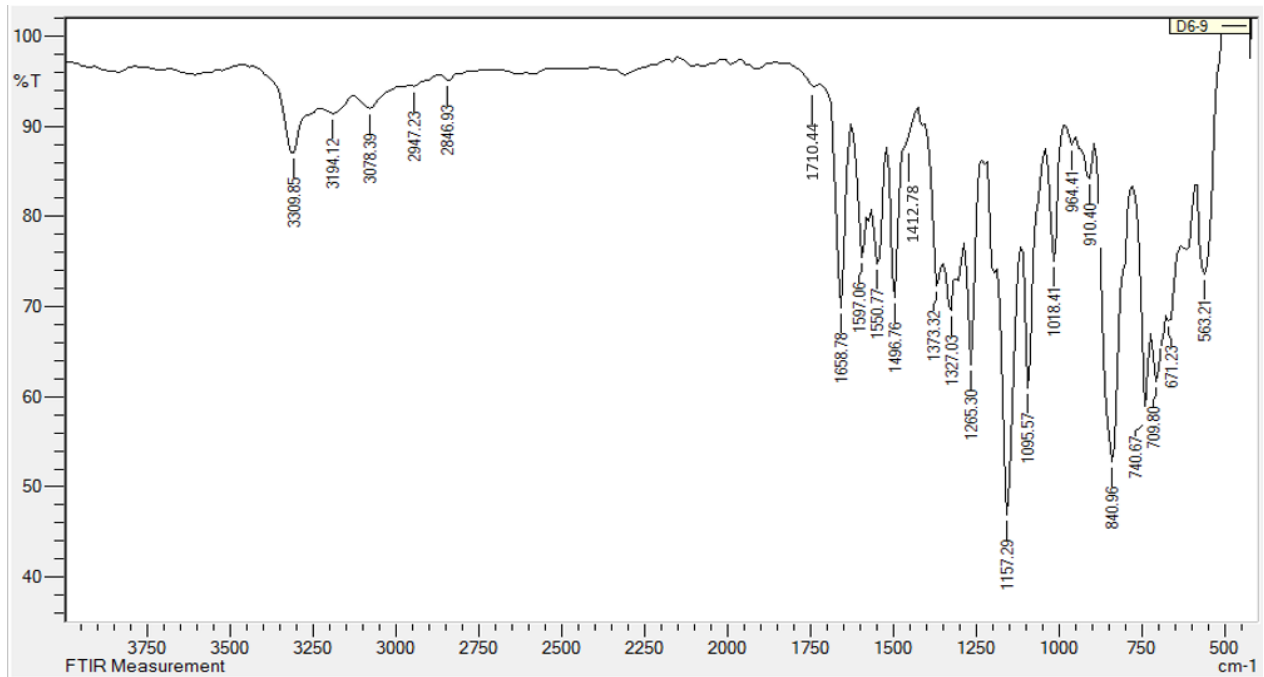

# <sup>1</sup>H NMR, <sup>13</sup>C NMR, HRMS, and FT-IR spectra of SH7

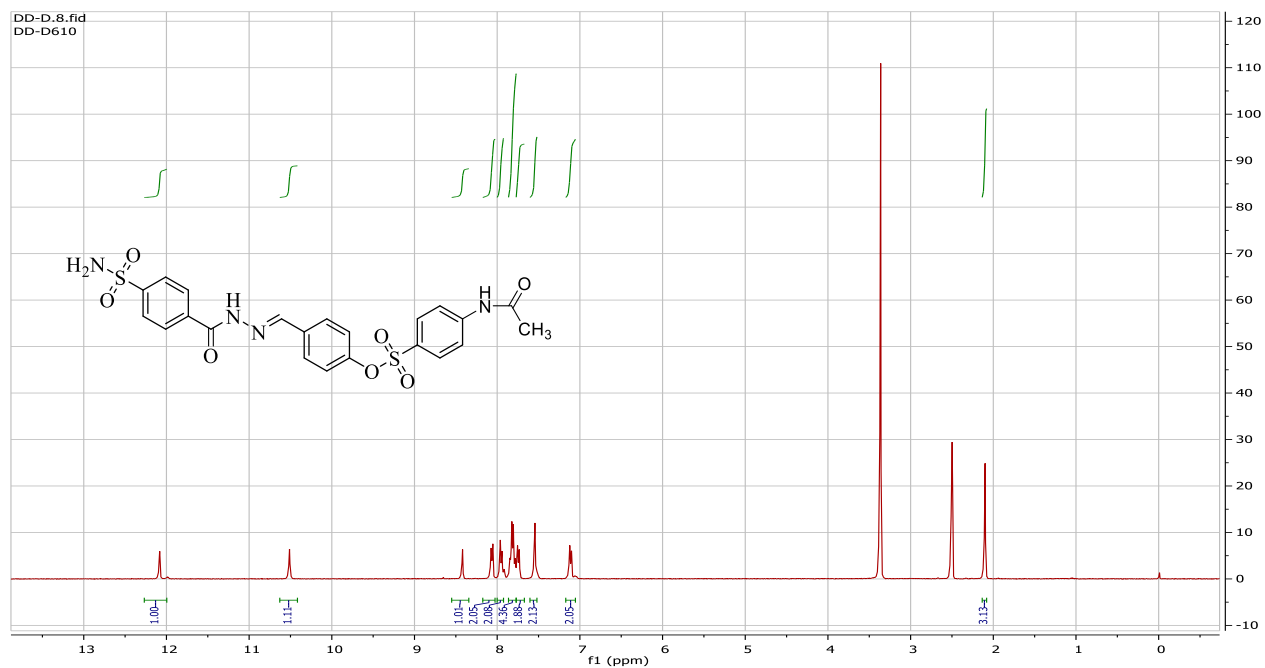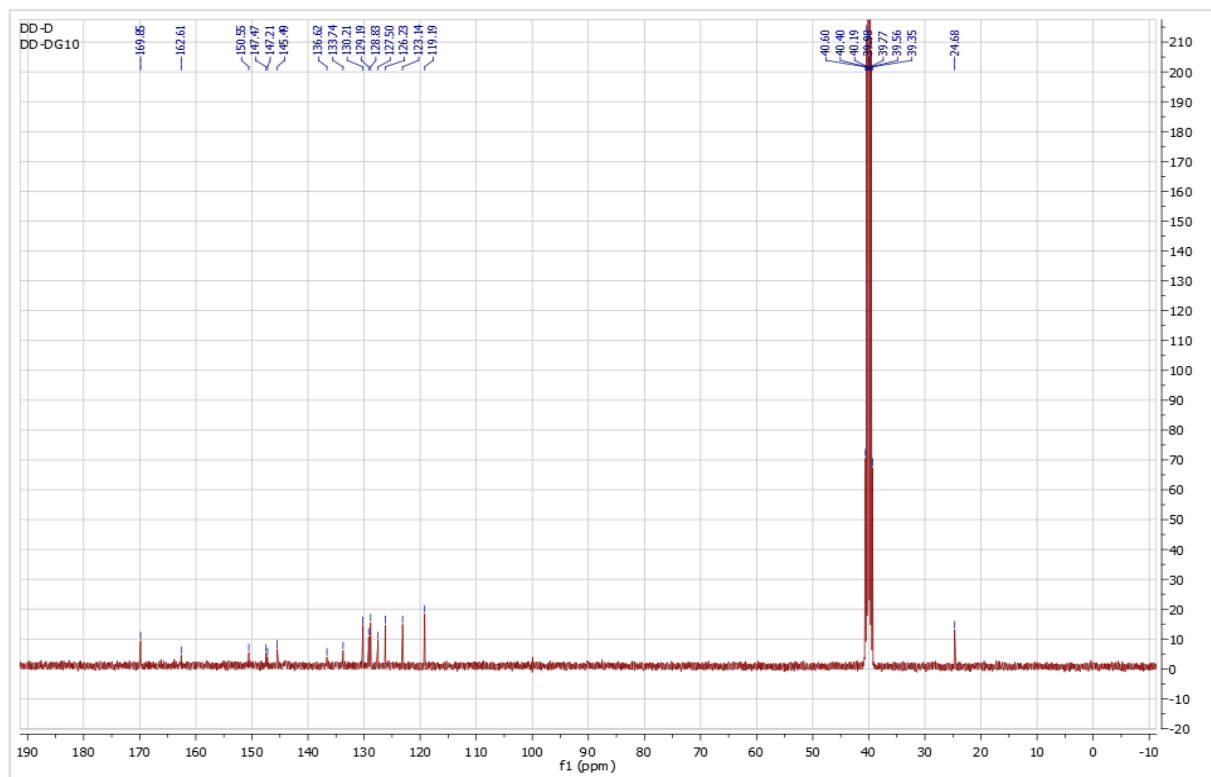

# User Spectra

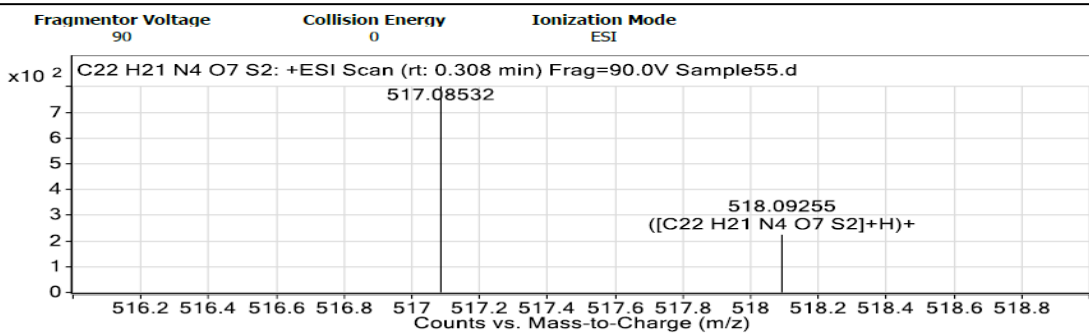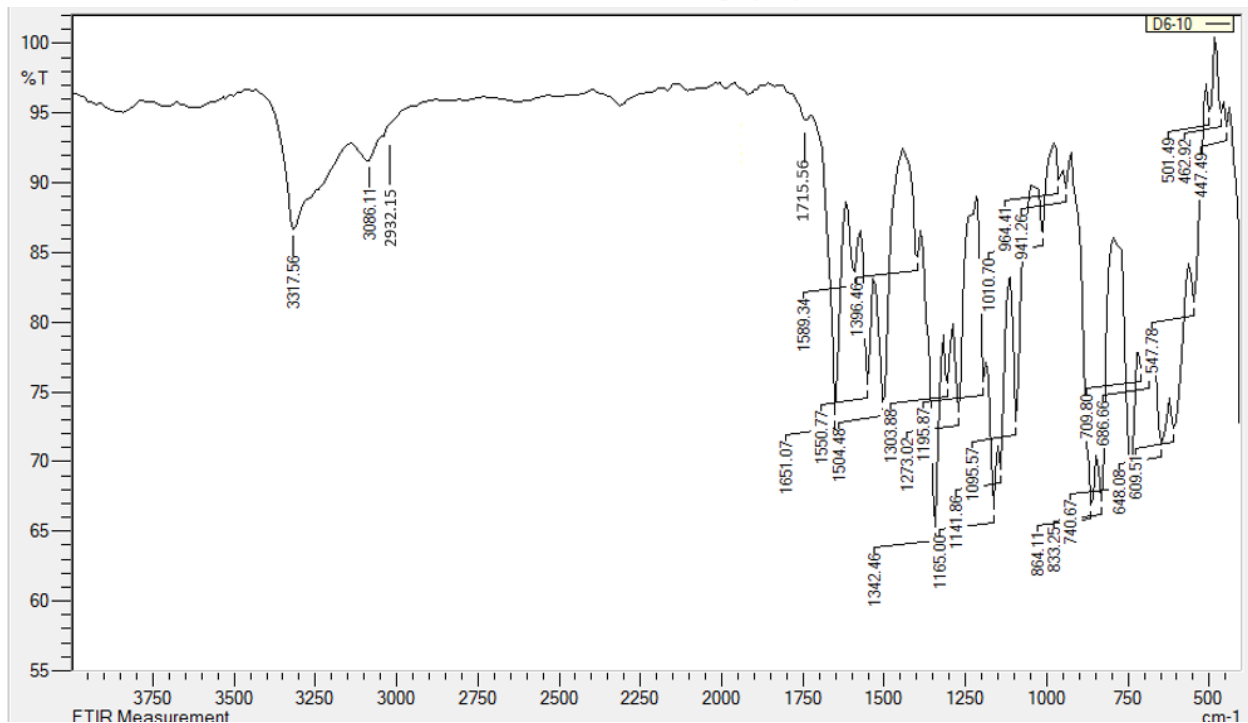

$^1\text{H}$  NMR,  $^{13}\text{C}$  NMR, HRMS, and FT-IR spectra of **SH8**

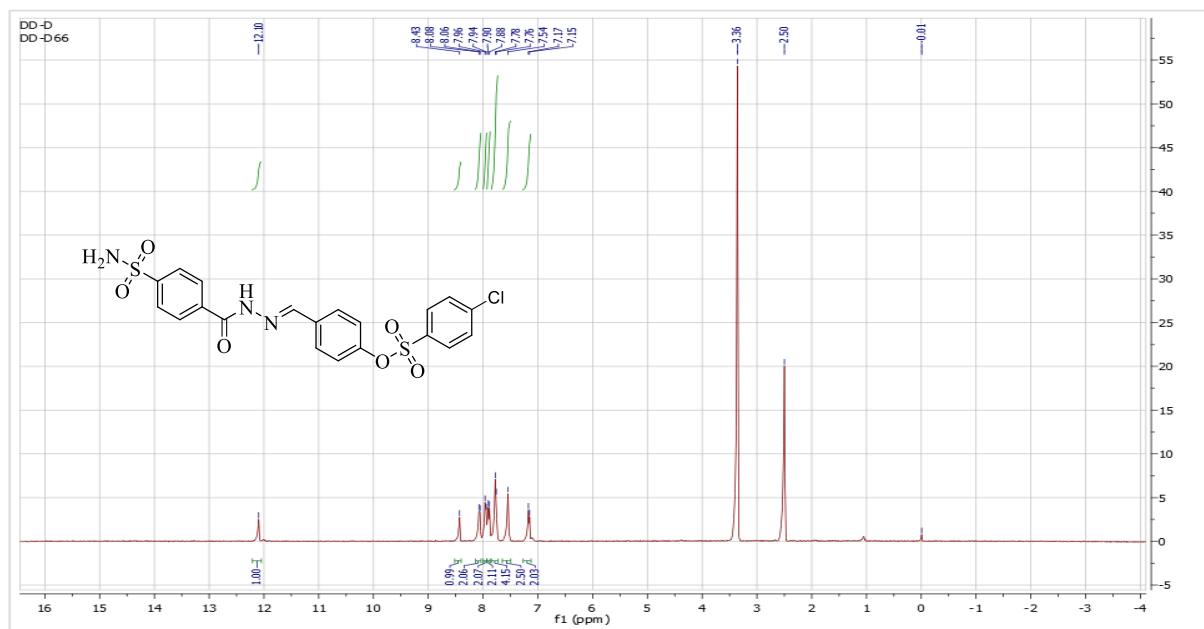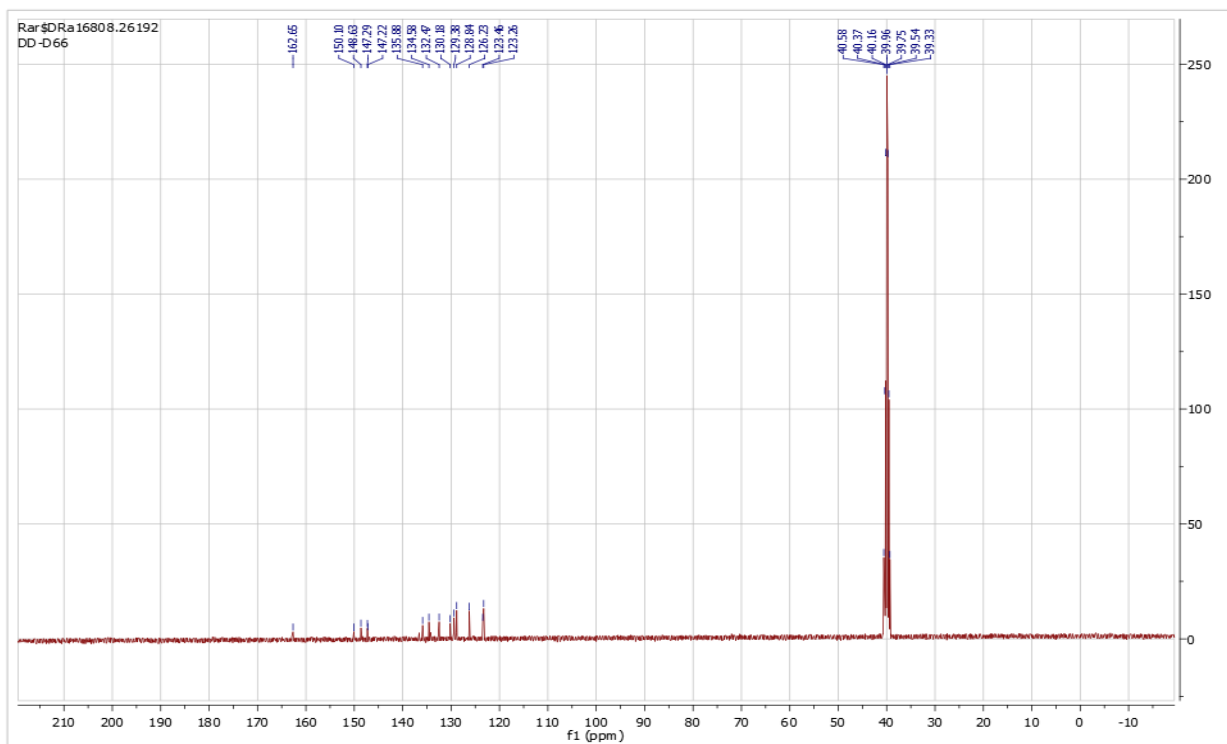



# User Spectra

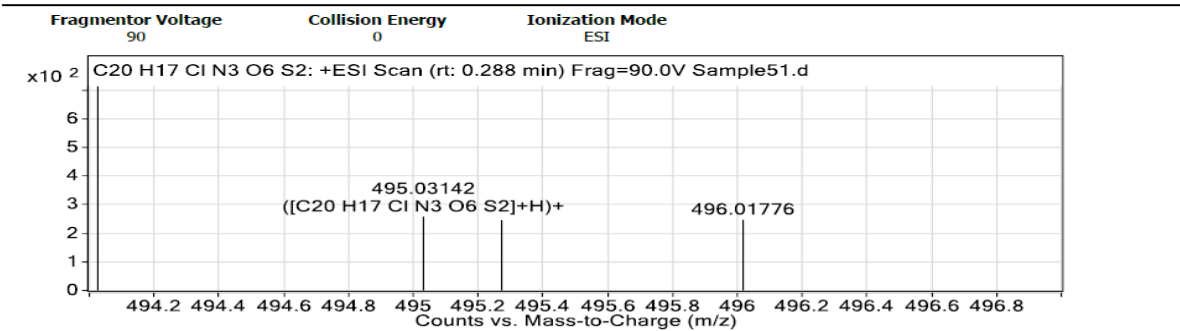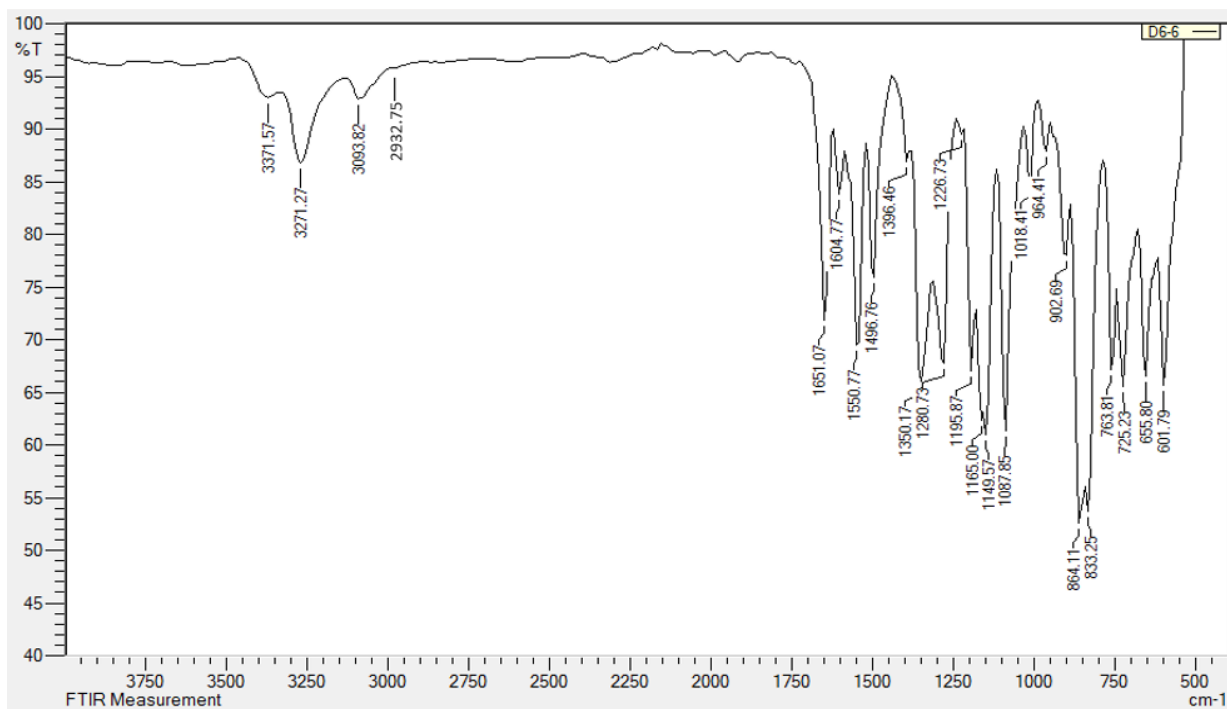

$^1\text{H}$  NMR,  $^{13}\text{C}$  NMR, HRMS, and FT-IR spectra of **SH9**

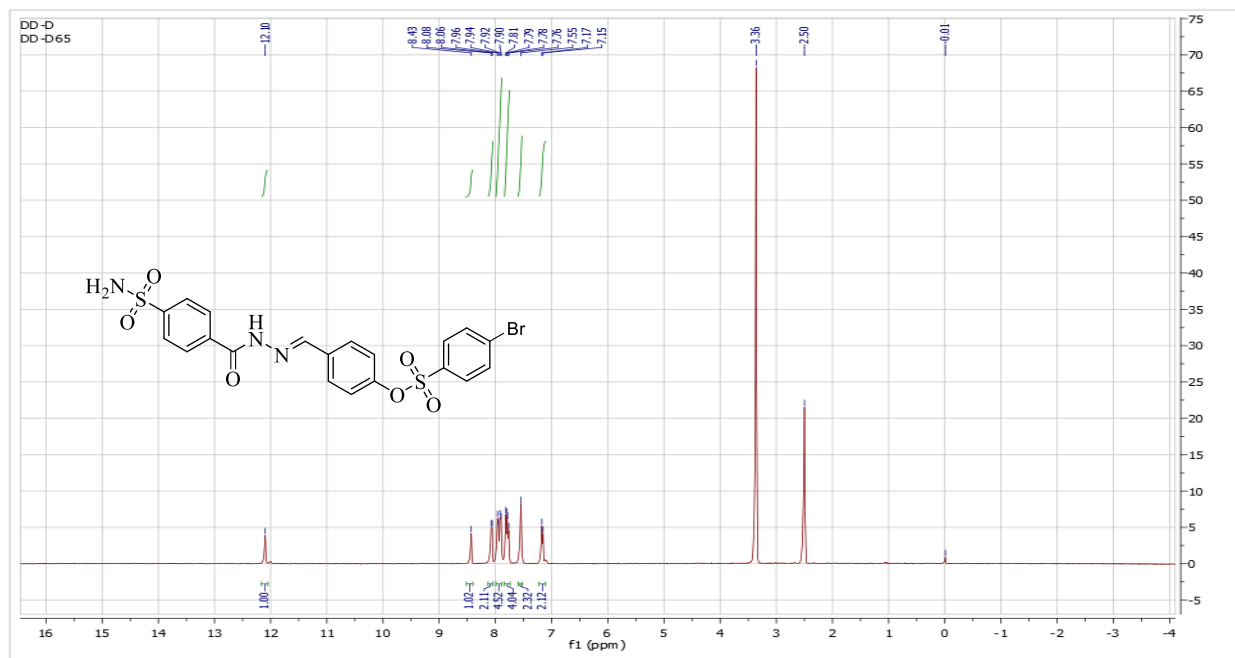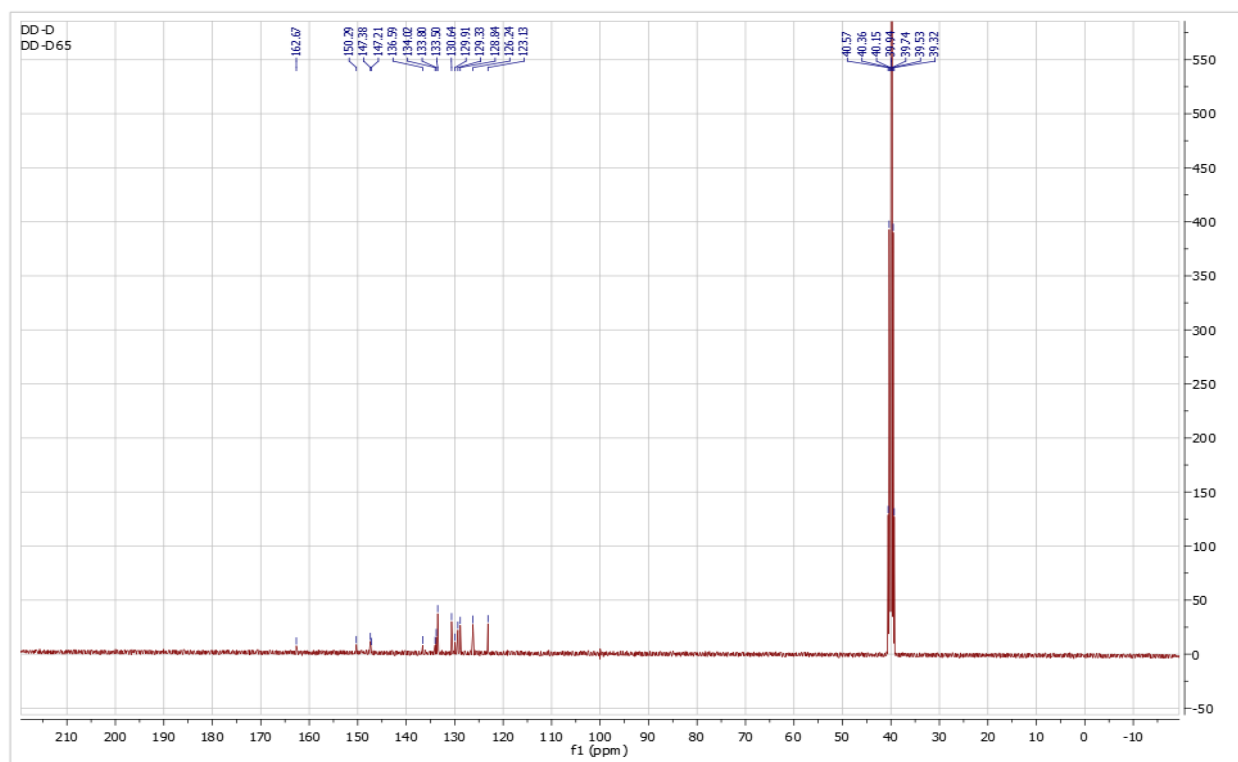

User Spectra

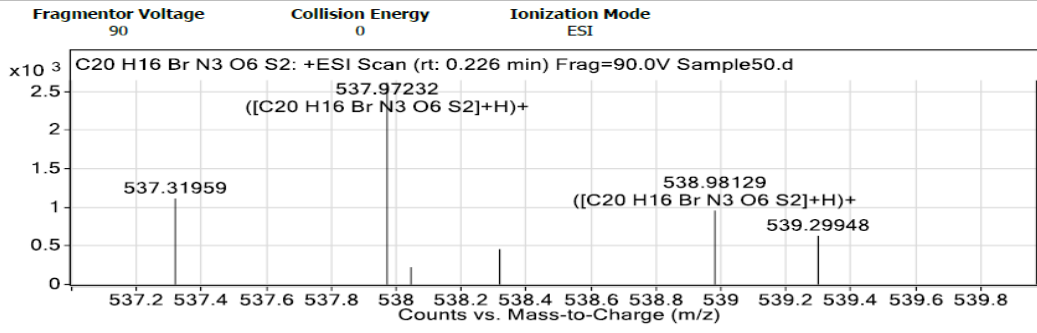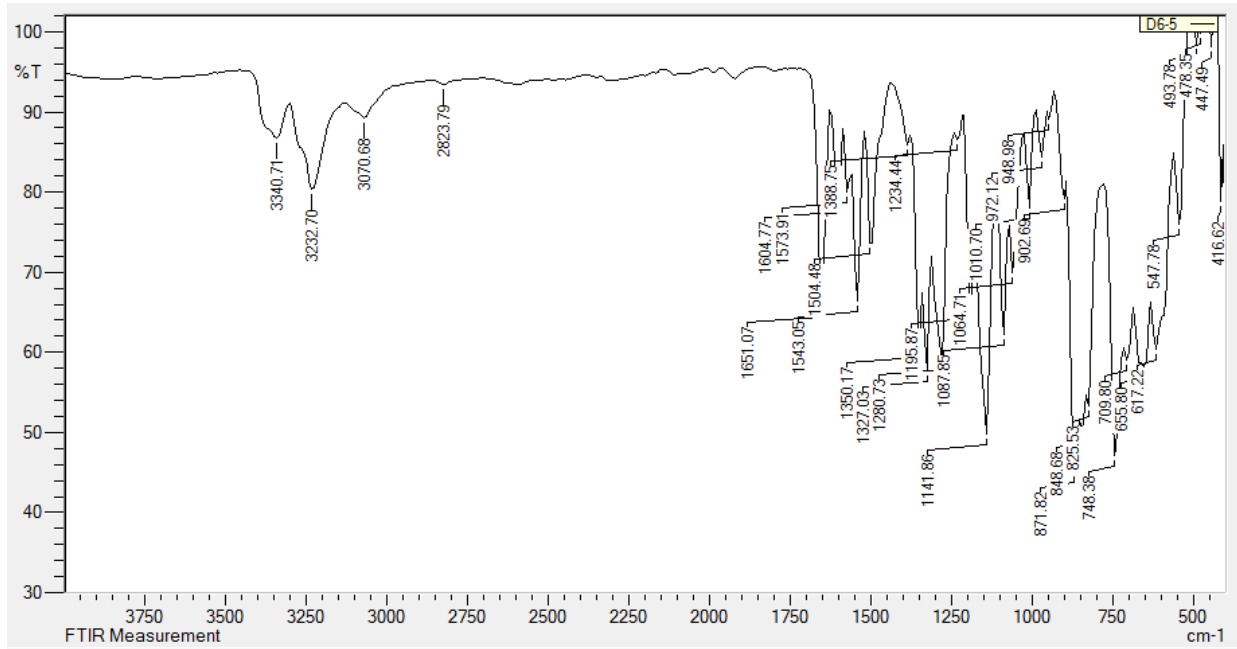

$^1\text{H}$  NMR,  $^{13}\text{C}$  NMR, HRMS, and FT-IR spectra of **SH10**

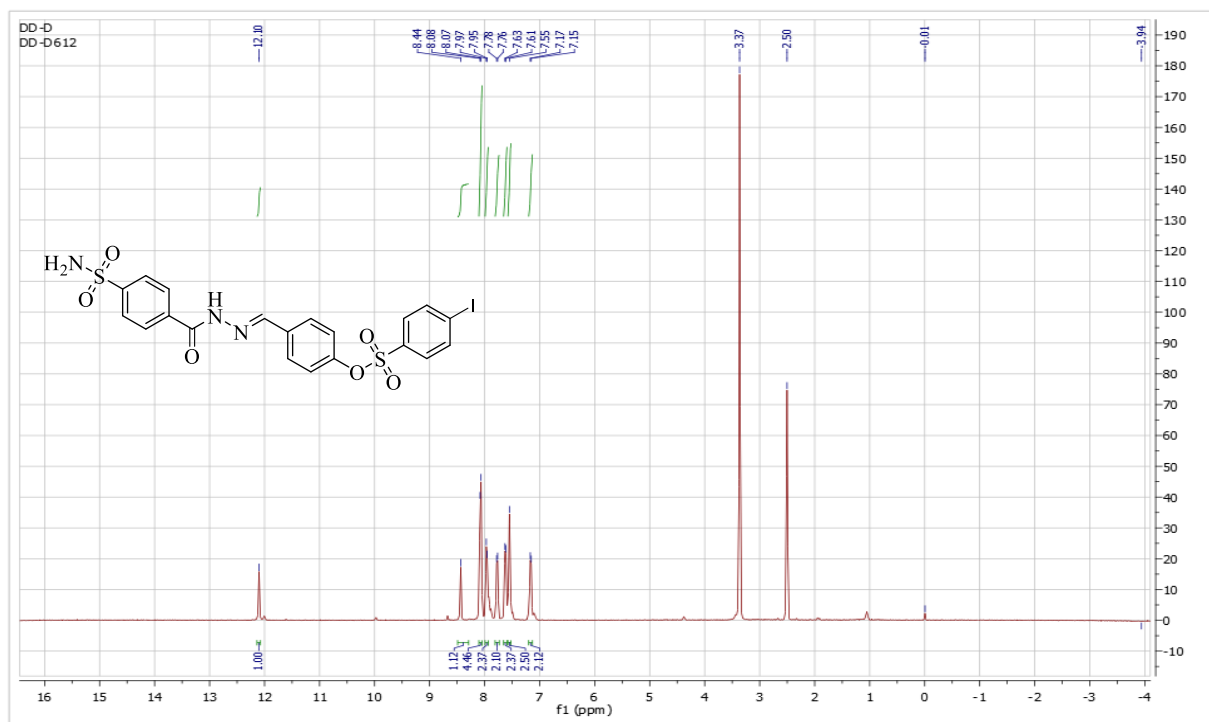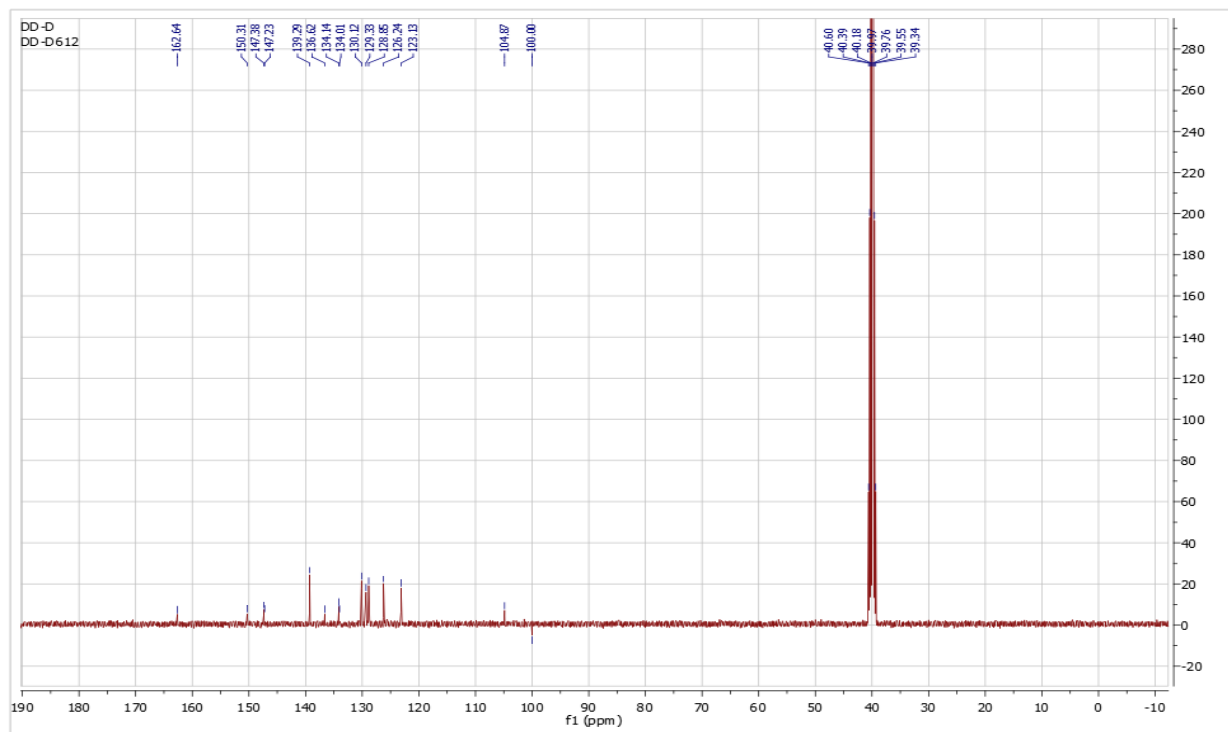

### User Spectra

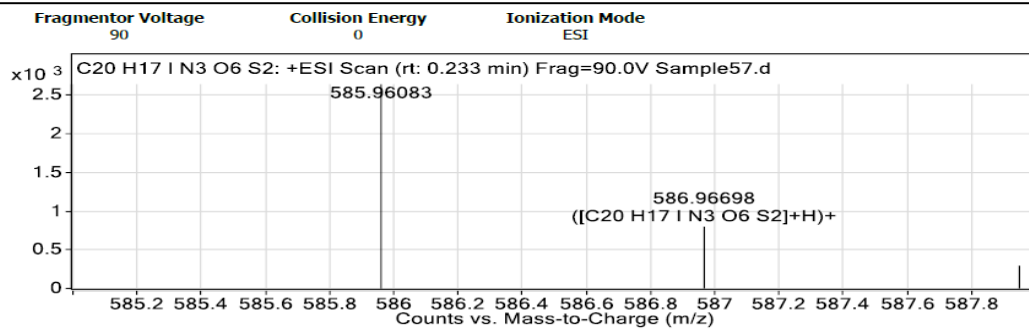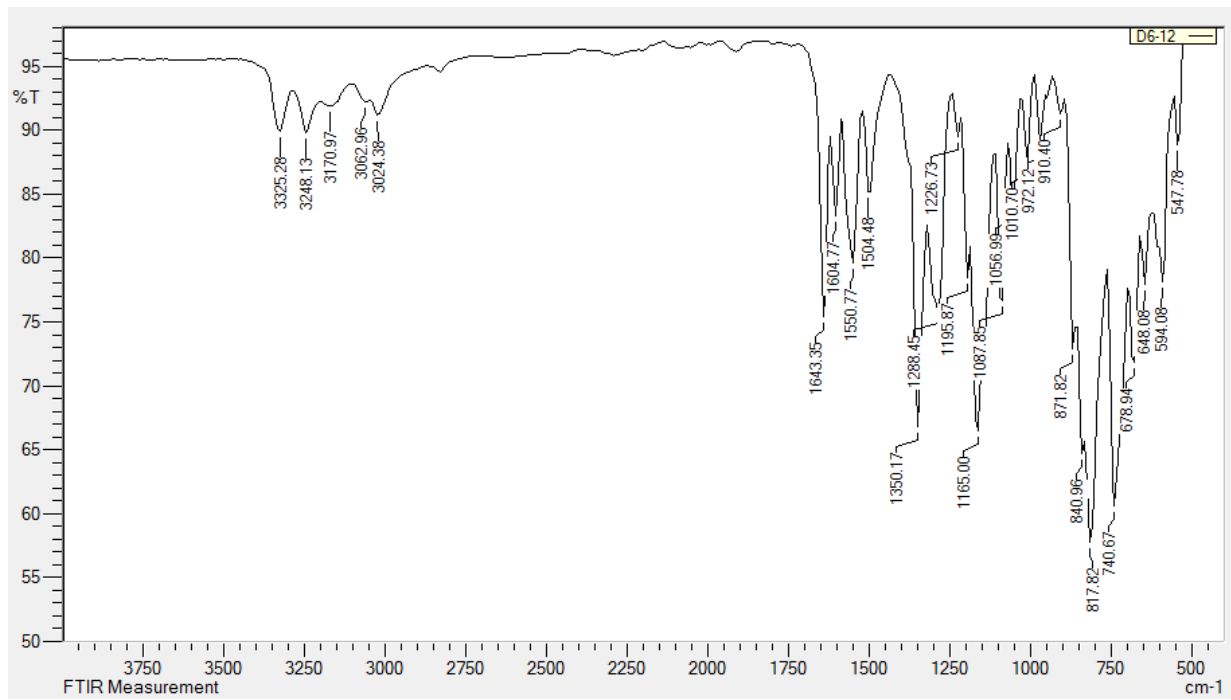

$^1\text{H}$  NMR,  $^{13}\text{C}$  NMR, HRMS, and FT-IR spectra of **SH11**

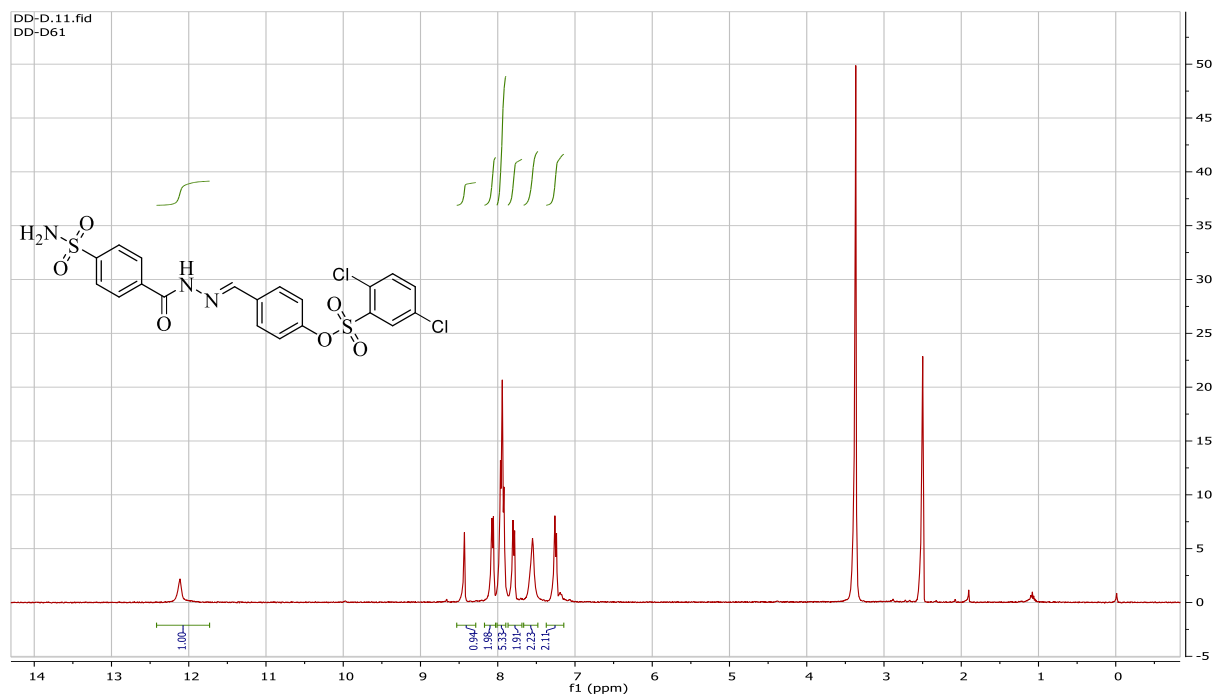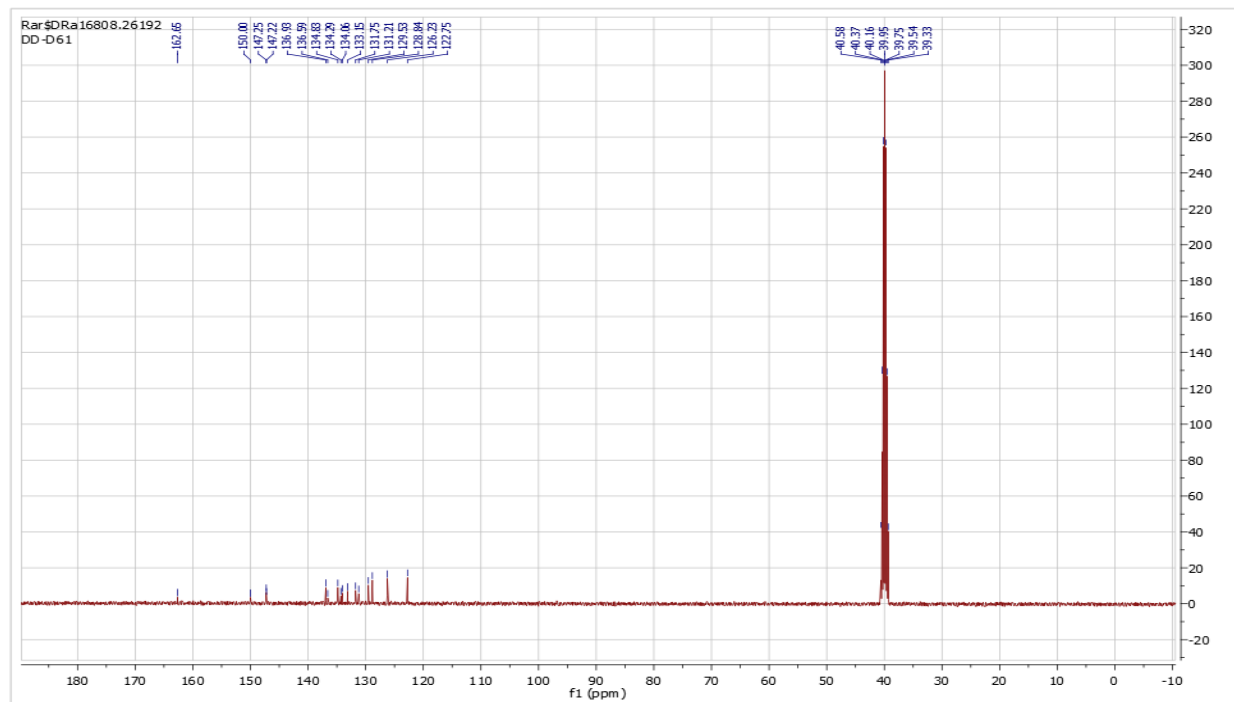

### User Spectra

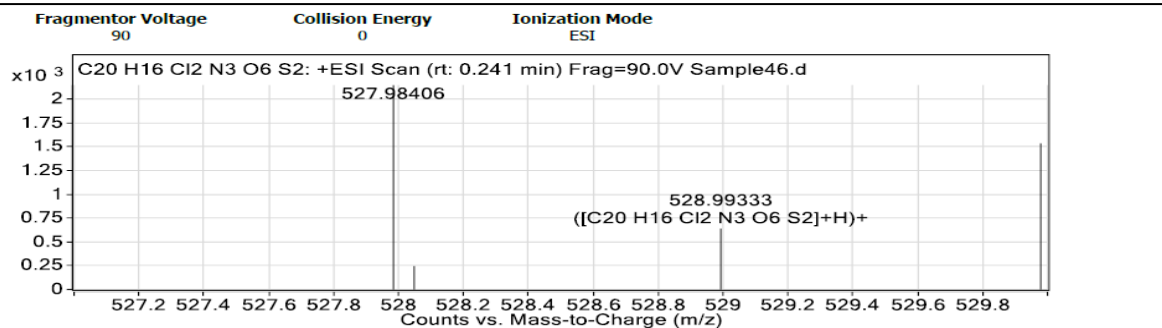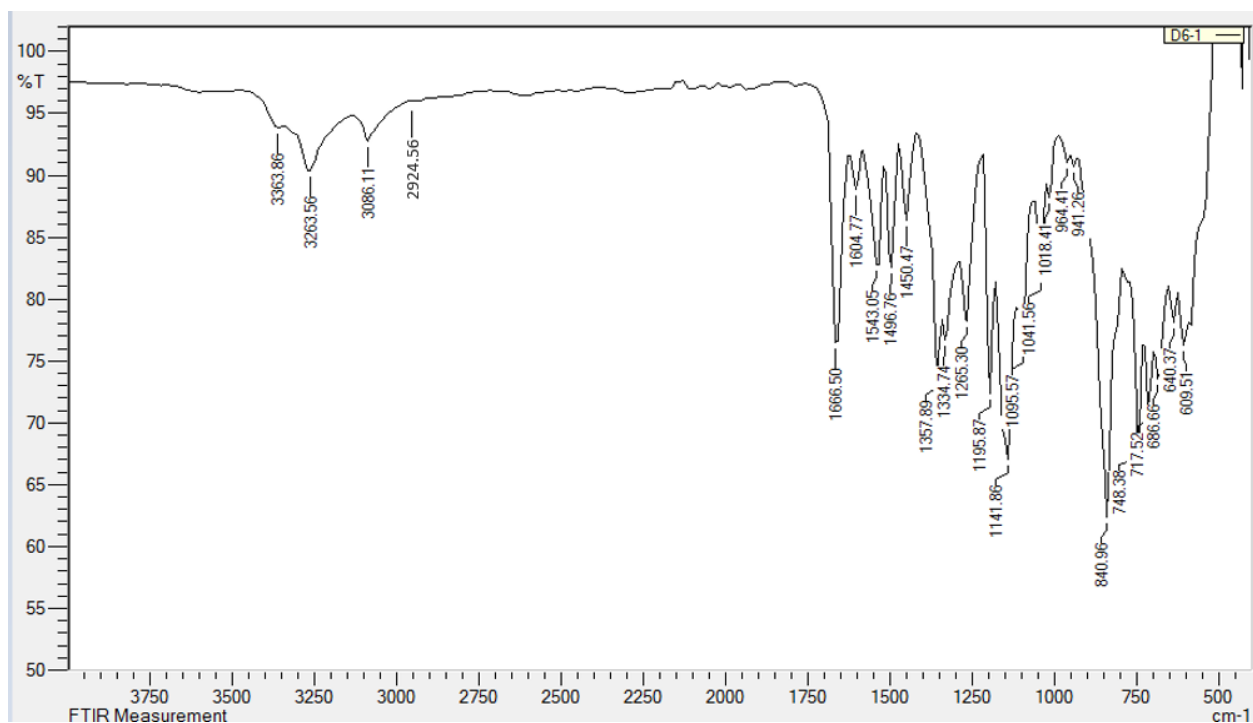

$^1\text{H}$  NMR,  $^{13}\text{C}$  NMR, HRMS, and FT-IR spectra of **SH12**

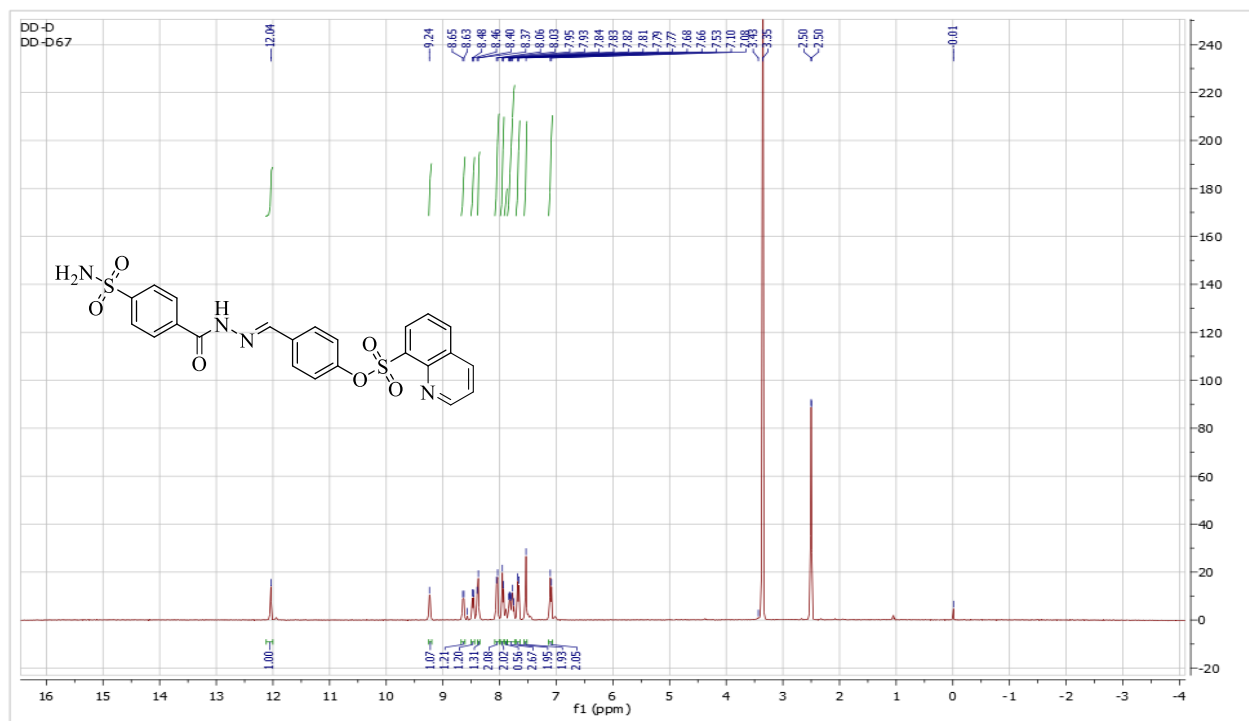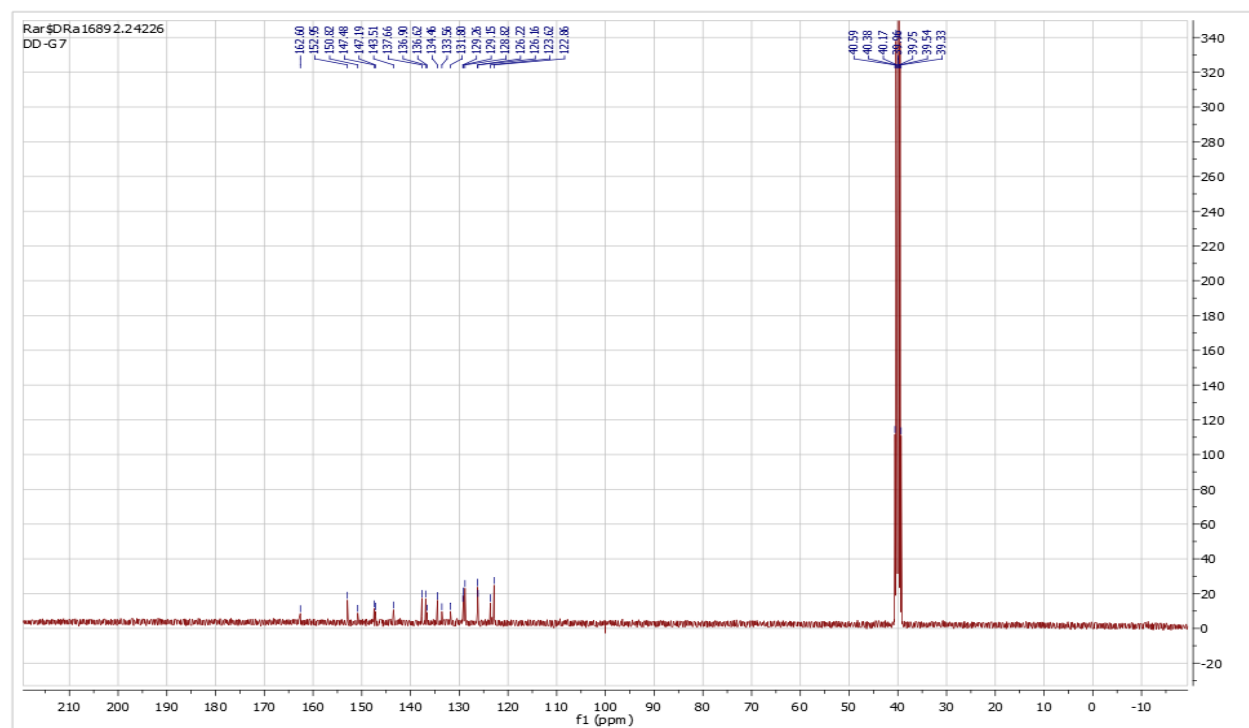



### User Spectra

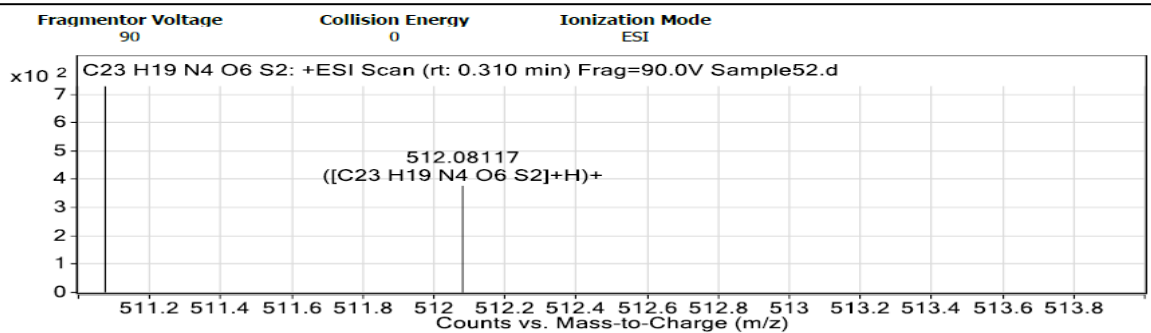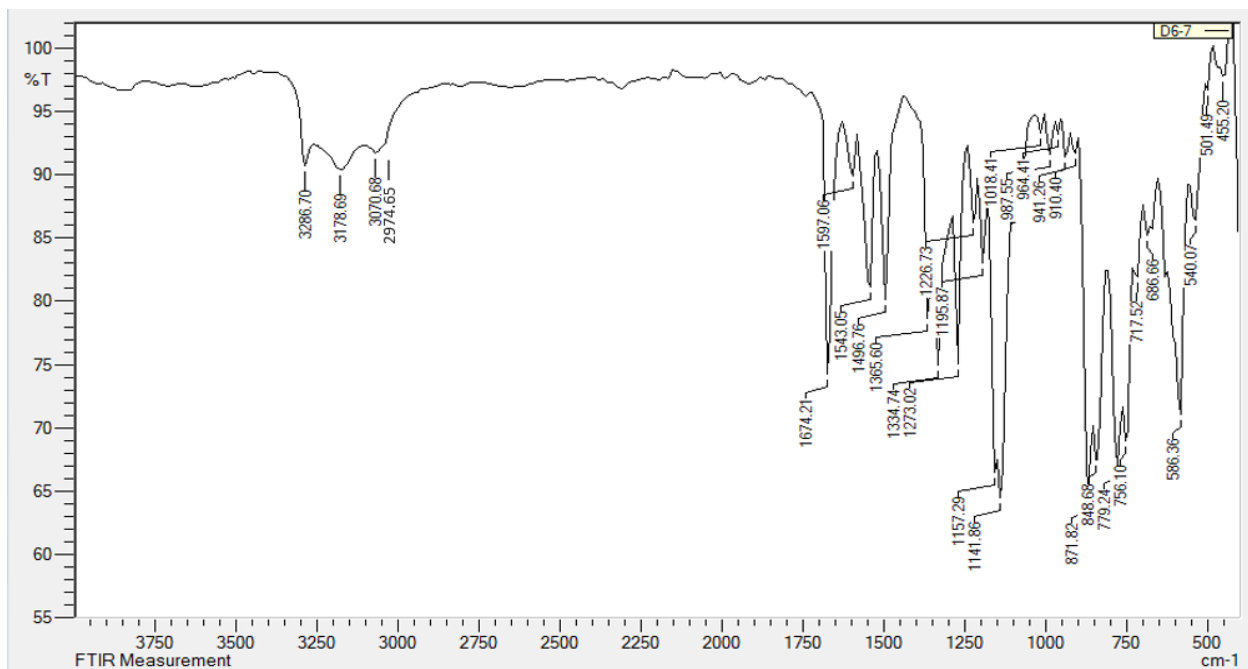

$^1\text{H}$  NMR,  $^{13}\text{C}$  NMR, HRMS, and FT-IR spectra of **SH13**

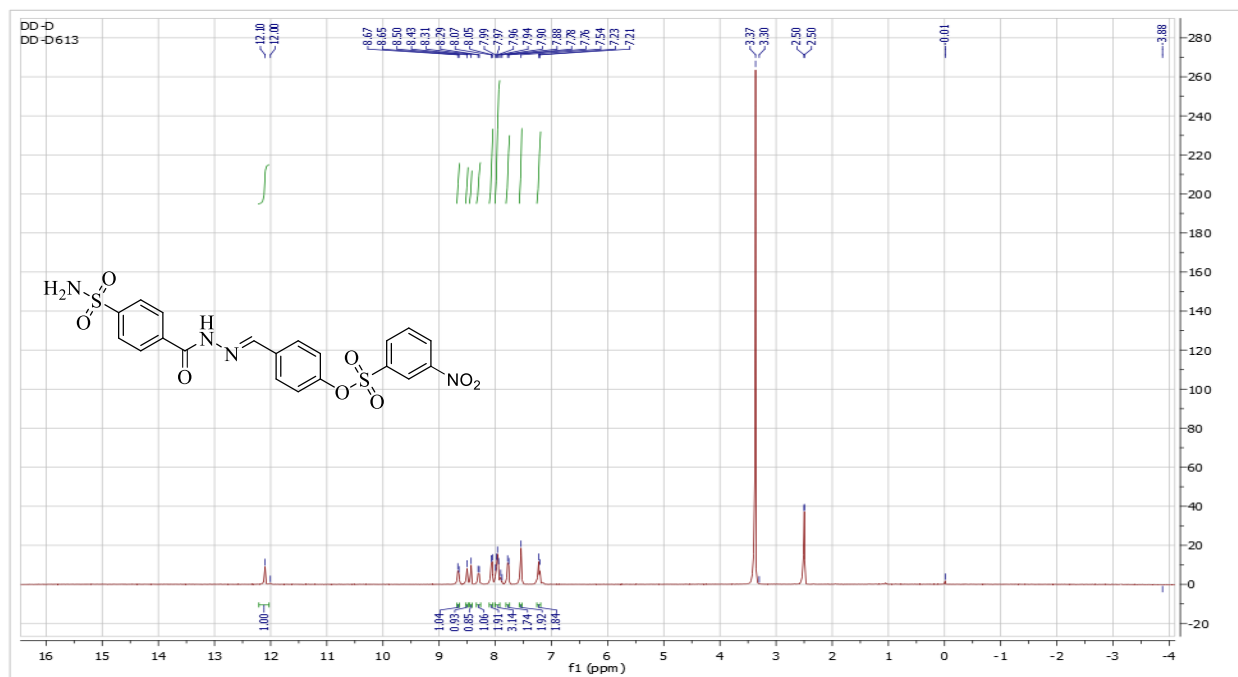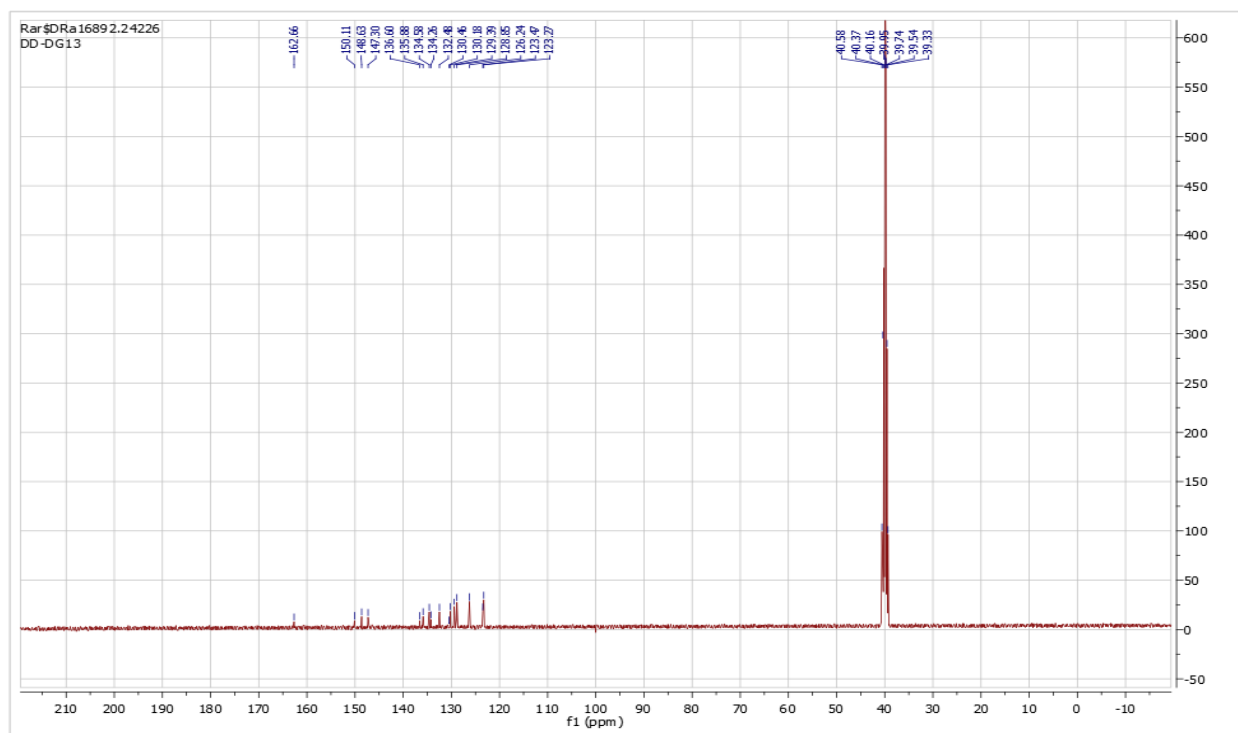

# User Spectra

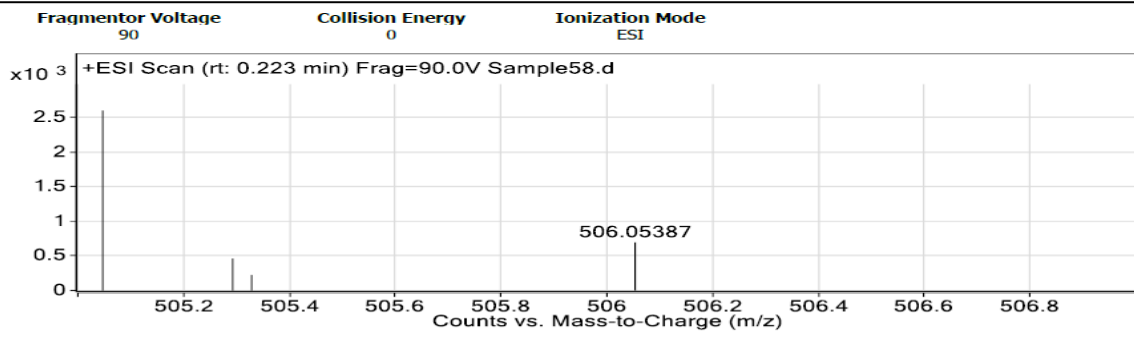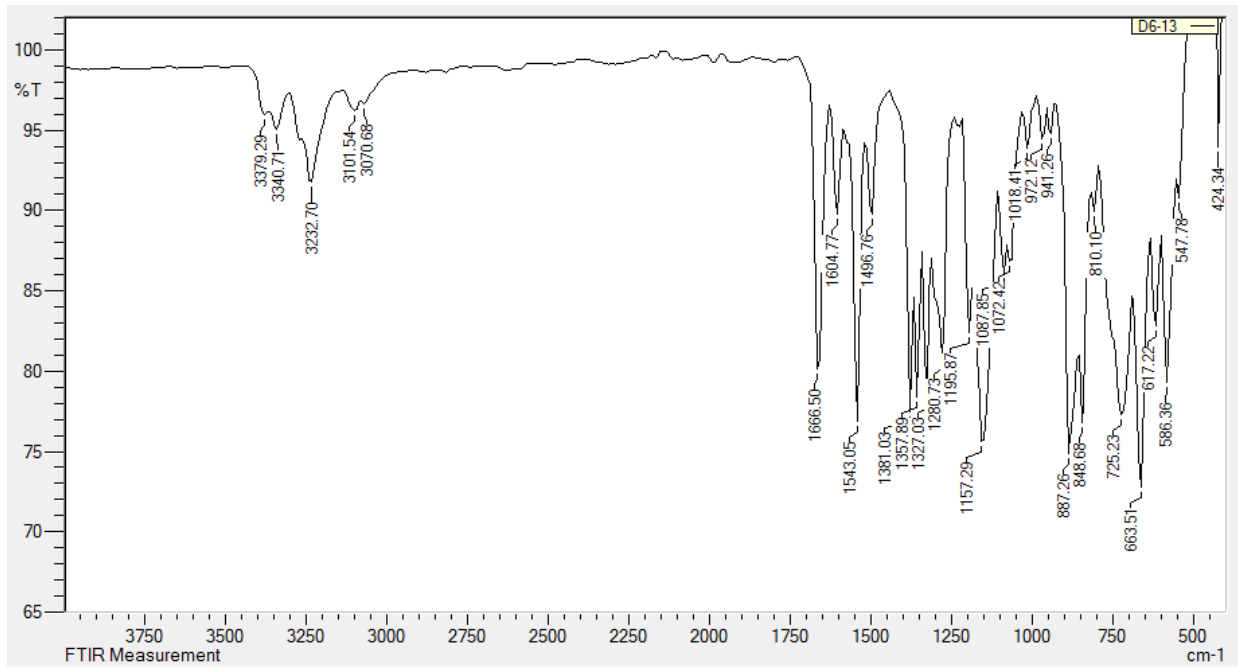

$^1\text{H}$  NMR,  $^{13}\text{C}$  NMR, HRMS, and FT-IR spectra of **SH14**

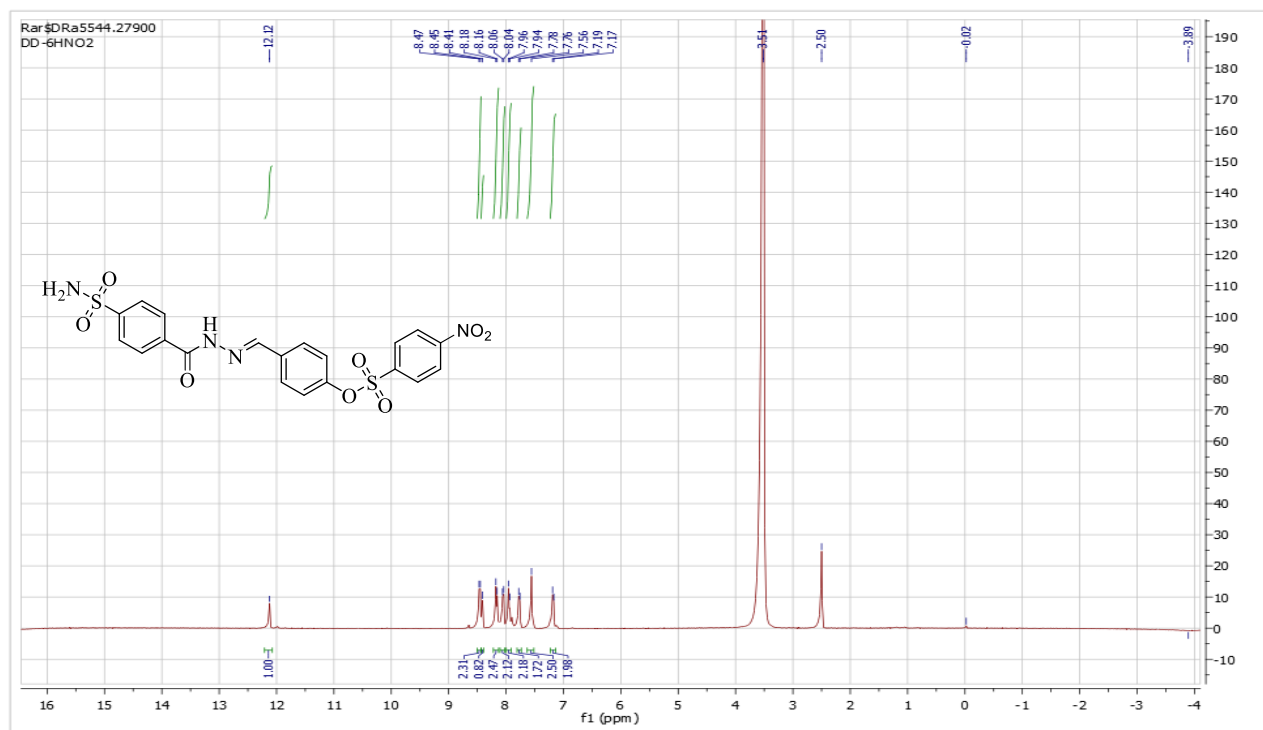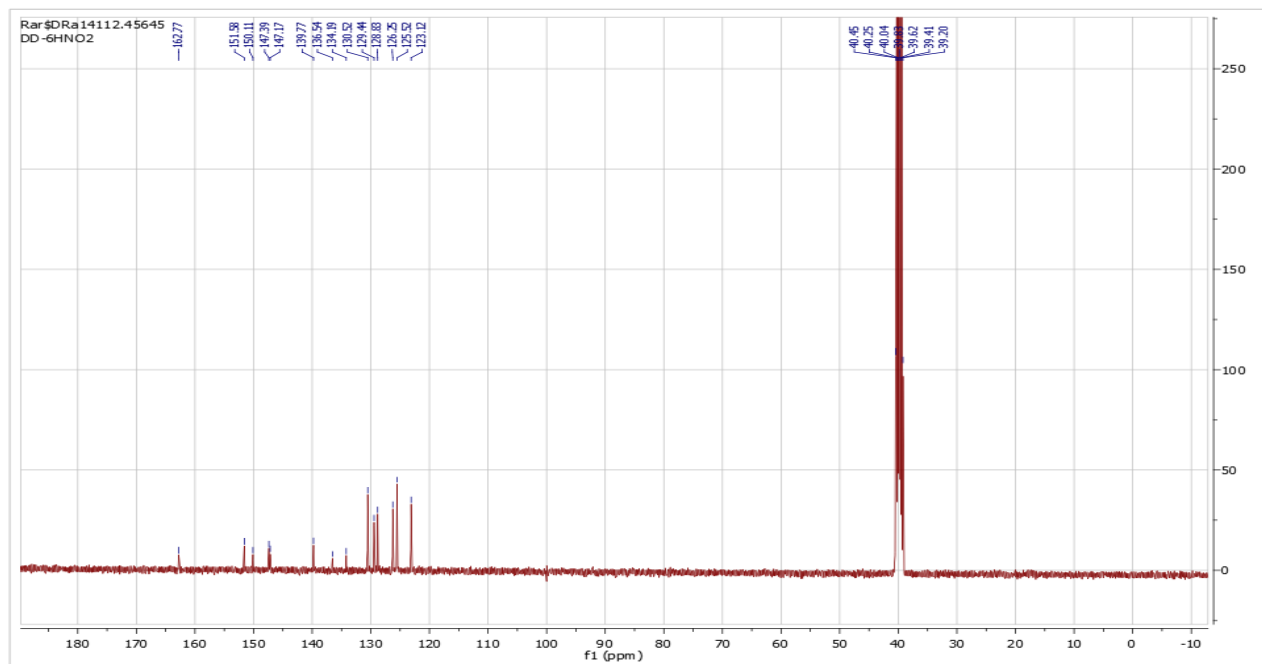

### User Spectra

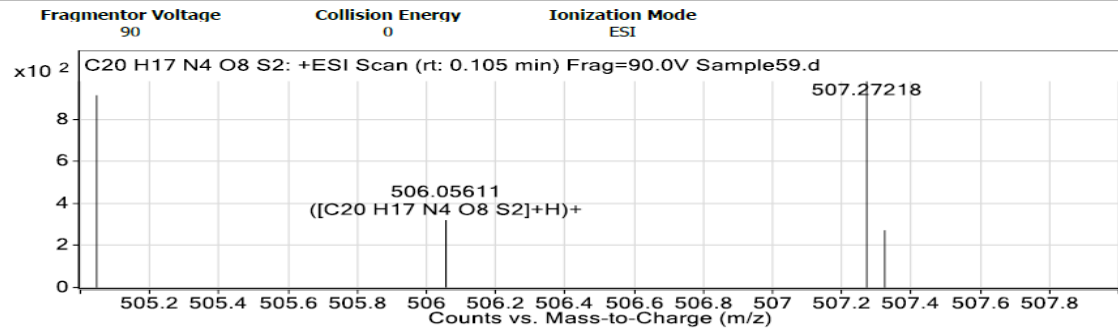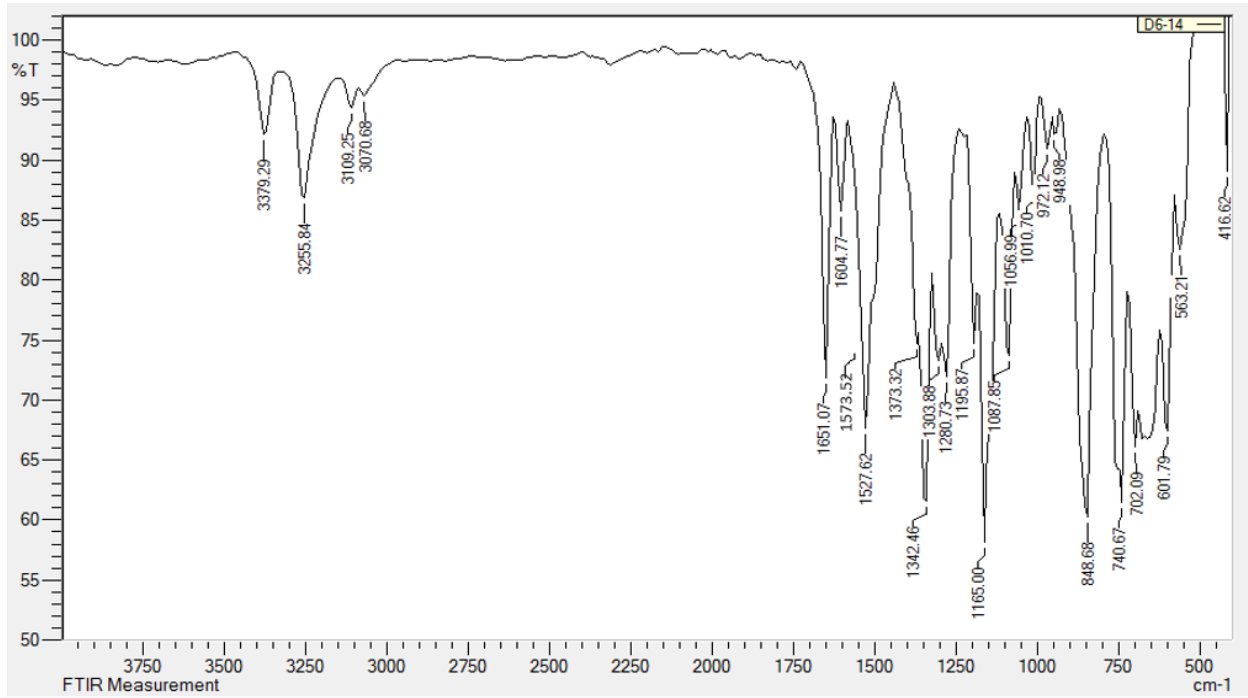

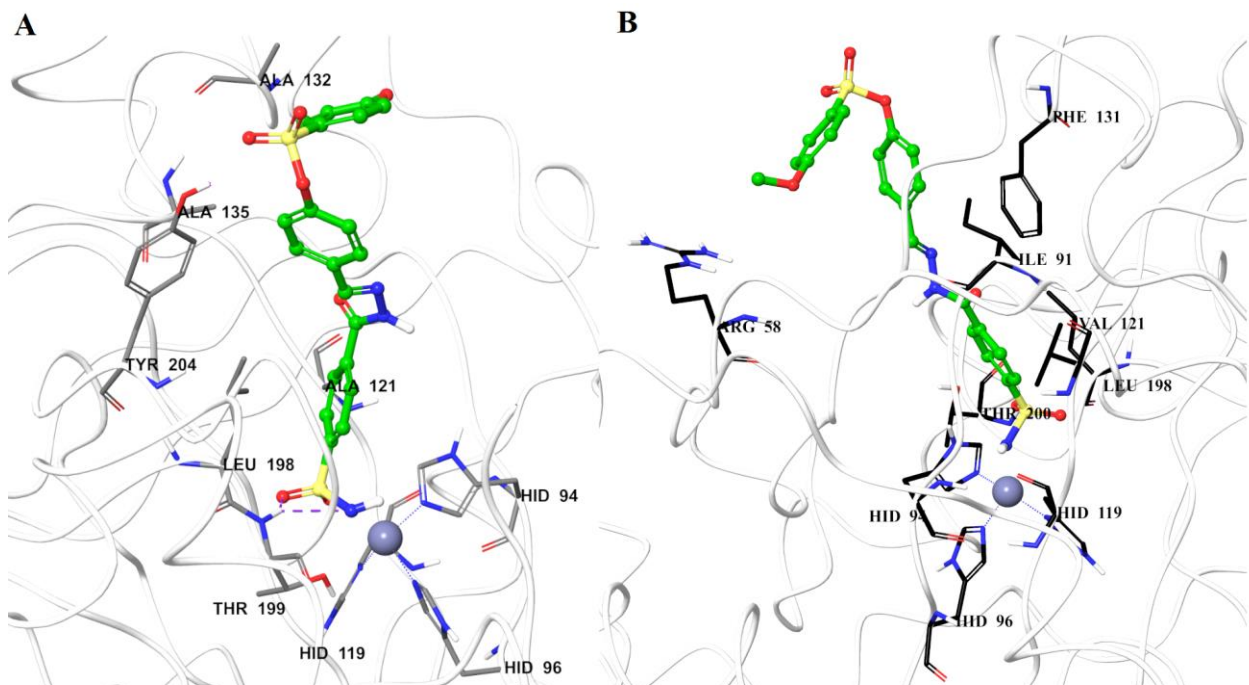

Binding mode of **SH3** in the active site of hCA I (A) and II (B). Ligand is represented as green color stick and balls, protein backbone as a white thin tube, hydrogen bonds as purple dashes, and important amino acid residues as gray and black sticks, for hCA I and II, respectively. The zinc ion is shown as a faded blue sphere.
